# Supplementary material for: Identification of NETs-related biomarkers and molecular clusters in systemic lupus erythematosus
Source: Front Immunol. 2023 Apr 18;14:1150828. doi: 10.3389/fimmu.2023.1150828 (PMC10151561; doi:10.3389/fimmu.2023.1150828)
Supplement: Supplementary file 2 [file Table_2.xls]

id	logFC	AveExpr	t	P.Value	adj.P.Val	B
HNRNPL	-2.924389118	5.217666914	-21.48621187	2.12E-63	4.40E-59	133.0237548
THOC4	-1.919829114	2.706374899	-20.19732973	1.59E-58	1.65E-54	122.0077947
NUTF2	-1.541039533	6.195726193	-19.69654159	1.29E-56	8.89E-53	117.6957699
AMFR	-2.056407788	2.586349883	-19.07442173	3.06E-54	1.59E-50	112.3192889
SFRS6	-2.239875285	2.642277607	-18.87708749	1.74E-53	7.23E-50	110.6100489
LOC100289610	-2.185341869	3.553847342	-18.15557188	1.02E-50	3.52E-47	104.348629
NCK1	-1.29130347	3.116360514	-17.75763973	3.43E-49	1.02E-45	100.8897182
TBL1XR1	-1.6447504	3.520977168	-17.44011989	5.68E-48	1.47E-44	98.12835154
USF1	-2.189930273	4.068157541	-17.16921133	6.23E-47	1.44E-43	95.77209883
FBXO9	1.776889432	7.307864682	16.98337888	3.22E-46	6.68E-43	94.155998
TRIM23	-1.353027452	2.822213146	-16.9250863	5.39E-46	1.02E-42	93.64912417
TOMM22	-1.375185319	4.480221109	-16.72937563	3.04E-45	5.25E-42	91.94771496
LOC100288954	-0.807115484	2.807318545	-16.39782468	5.67E-44	9.05E-41	89.06721213
LOC541473	-0.73617772	2.37976574	-16.33273057	1.01E-43	1.49E-40	88.50203343
MYC	-2.127489014	5.678660938	-16.22731876	2.55E-43	3.53E-40	87.58709743
ARHGEF7	1.453616718	5.685617373	15.77484312	1.37E-41	1.78E-38	83.66493676
PACS1	-1.180796171	3.705723503	-15.73001023	2.04E-41	2.48E-38	83.27685393
LPCAT4	-0.8632317	2.598445964	-15.69149554	2.86E-41	3.29E-38	82.94355117
DVL1	1.59559237	7.667886376	15.05486327	7.58E-39	8.28E-36	77.44807308
ZNF532	-1.495693363	3.545471738	-14.93833487	2.10E-38	2.18E-35	76.44549484
C16orf53	1.508168118	7.295304422	14.68578237	1.90E-37	1.88E-34	74.27677826
GALNT6	-0.869884089	2.397049863	-14.66926106	2.19E-37	2.07E-34	74.13511836
TOP1P2	0.62509996	3.30967324	14.57601385	4.94E-37	4.27E-34	73.33609686
NDRG1	1.154661014	9.985120385	14.04926975	4.74E-35	3.78E-32	68.84054003
SLC26A2	-0.693324541	2.379990408	-13.924448	1.39E-34	1.07E-31	67.78020477
KIAA0090	-1.495921053	2.592269729	-13.9161798	1.50E-34	1.11E-31	67.71004115
AP1AR	-0.720521507	2.412489765	-13.766574	5.42E-34	3.75E-31	66.44211876
PSMC2	-1.16509437	4.386616292	-13.71603387	8.37E-34	5.60E-31	66.01450037
HCCS	-1.03274756	5.925970192	-13.64683877	1.52E-33	9.82E-31	65.42964646
PCYOX1	-0.731965948	2.620645296	-13.57076002	2.91E-33	1.83E-30	64.78743403
STX12	0.874167391	9.498909055	13.50597091	5.06E-33	3.09E-30	64.2412189
LOC440288	-1.144805118	2.779786036	-13.42622863	1.00E-32	5.93E-30	63.56984072
ARID2	-1.129751315	4.433366925	-13.10831646	1.50E-31	8.65E-29	60.90364174
ACAD8	-1.020896475	2.586770153	-12.97183608	4.77E-31	2.61E-28	59.76444563
COPG	-1.249585667	6.672037418	-12.96327053	5.13E-31	2.73E-28	59.693063
MKLN1	1.175221205	9.898883694	12.88111241	1.03E-30	5.33E-28	59.00908034
MBD4	-1.461743406	7.300165323	-12.83828663	1.48E-30	7.47E-28	58.65305499
EWSR1 /// FLI1	-0.644268958	2.403326559	-12.79521719	2.12E-30	1.05E-27	58.29536085
LOC440983	-1.26699849	8.16649202	-12.69330284	5.01E-30	2.42E-27	57.45040817
PRPF39	-1.828918646	4.538746463	-12.6007715	1.09E-29	4.91E-27	56.68505728
ARF6	-1.053306371	5.576069776	-12.53510616	1.89E-29	8.34E-27	56.14299273
MAPKAPK5	-1.12665684	5.498264113	-12.36098856	8.10E-29	3.50E-26	54.71009923
CPSF4	0.912828728	7.326651964	12.34710827	9.09E-29	3.85E-26	54.59615596
SELT	-1.706966765	7.671790759	-12.28516106	1.52E-28	6.32E-26	54.08815488
ZNF585B	-1.116351204	3.02306397	-12.14424498	4.91E-28	2.00E-25	52.93581211
ACACB	0.82927903	6.854848392	12.08485867	8.03E-28	3.20E-25	52.45156265
DCAF11	1.423126378	6.804549999	12.01161761	1.47E-27	5.76E-25	51.8554949
LOC100287401	-0.736835583	2.938738315	-11.92231049	3.07E-27	1.16E-24	51.1304364
FOXN2	-1.122759051	3.899590722	-11.92175615	3.09E-27	1.16E-24	51.12594201
AKAP1	-0.841709337	2.974601377	-11.75717379	1.19E-26	4.34E-24	49.79498401
FURIN	-1.856831387	6.89308156	-11.68689524	2.12E-26	7.59E-24	49.2287668
SAFB2	-1.141017346	5.761137806	-11.64307287	3.03E-26	1.07E-23	48.87635697
MYCL1	-1.384476359	3.523087583	-11.51079494	8.92E-26	3.08E-23	47.81572655
RGP1	1.081975681	7.81012897	11.50849357	9.08E-26	3.09E-23	47.79731581
FLCN	-1.004394424	9.385332015	-11.47912158	1.15E-25	3.86E-23	47.56247057
MTDH	-0.97871212	2.848291332	-11.4391551	1.60E-25	5.25E-23	47.24330023
ZNF259	1.055940608	7.212639821	11.35636581	3.12E-25	1.01E-22	46.58357324
COCH	-1.176974505	7.687523915	-11.31263785	4.44E-25	1.42E-22	46.23590162
MYH14	0.821610637	5.947565853	11.30007532	4.91E-25	1.54E-22	46.13612113
PIM3	1.258856646	9.516700795	11.27152017	6.19E-25	1.89E-22	45.90948567
CFL1	-1.414282659	8.543338288	-11.22966459	8.67E-25	2.61E-22	45.57771635
STT3A	-1.213112731	6.202771981	-11.17825134	1.31E-24	3.88E-22	45.17089176
BAT2L2	-1.019404076	8.188197828	-10.99712858	5.59E-24	1.61E-21	43.74401081
LOC285949	1.502628788	4.852941977	10.97435681	6.70E-24	1.90E-21	43.56532485
EMD	0.833915792	6.331841516	10.95267713	7.97E-24	2.22E-21	43.39535812
ATP6V1G1	-0.864080329	9.062538637	-10.95183573	8.02E-24	2.22E-21	43.38876453
CXorf40B	-1.329120589	5.232368661	-10.93616698	9.09E-24	2.48E-21	43.26601844
PRDM2	-1.58130108	7.458322817	-10.87680795	1.46E-23	3.92E-21	42.80171101
RPN1	-0.848147701	8.493958629	-10.76738733	3.47E-23	9.18E-21	41.94876476
RAB12	-1.350299521	3.814235228	-10.76638487	3.50E-23	9.18E-21	41.94096837
SIK1	-0.821936799	3.606016721	-10.76283244	3.59E-23	9.32E-21	41.91334265
MRFAP1	0.719169929	11.82167296	10.64776856	8.91E-23	2.25E-20	41.02078252
PSIP1	1.087586857	4.257796027	10.63963791	9.50E-23	2.37E-20	40.95787827
ARPP19	-0.796576117	2.87711814	-10.61237933	1.18E-22	2.91E-20	40.74714887
HELZ	-0.739014406	3.525698462	-10.58216363	1.49E-22	3.64E-20	40.51385085
ARL11	-0.864095339	2.787723167	-10.54893901	1.94E-22	4.67E-20	40.25767743
GPM6B	-0.993834928	2.621772962	-10.51526243	2.52E-22	5.94E-20	39.99840326
AS3MT	-0.970103935	5.230830994	-10.50783937	2.67E-22	6.22E-20	39.94130581
MTM1	-0.758521886	6.056013936	-10.49273141	3.01E-22	6.93E-20	39.82515537
ZCCHC11	-1.227266632	5.206436863	-10.47586307	3.43E-22	7.81E-20	39.69556405
FBXO8	-0.86915974	3.891999187	-10.43990401	4.54E-22	1.01E-19	39.41963728
SNAPIN	-1.19953435	5.987653437	-10.39203839	6.59E-22	1.42E-19	39.05304733
TXNDC6	1.018569089	4.30629709	10.37573767	7.48E-22	1.60E-19	38.92838835
C20orf30	-1.131533887	4.206629584	-10.36063797	8.41E-22	1.78E-19	38.81299779
CWC15	-0.928689192	9.323561678	-10.33563736	1.02E-21	2.14E-19	38.62212323
FAM193B	-1.046191638	5.399617366	-10.30690834	1.28E-21	2.62E-19	38.4030581
SLC11A2	-0.624859804	2.641360947	-10.27225478	1.67E-21	3.40E-19	38.13921085
SFPQ	-0.991586002	5.785490238	-10.24499217	2.06E-21	4.15E-19	37.93194167
ZNF135	0.816497828	5.992326122	10.2395683	2.15E-21	4.29E-19	37.89073781
MED6	1.104044837	6.708314126	10.23547577	2.22E-21	4.38E-19	37.85965488
HNRNPC	0.58904371	11.19245134	10.21293185	2.64E-21	5.17E-19	37.68854228
TTC9C	1.081716226	4.6734325	10.21133476	2.67E-21	5.18E-19	37.67642712
ATP5F1	-0.874042732	9.454325245	-10.17483959	3.54E-21	6.80E-19	37.39983726
ABCB1	-1.095717821	3.36444731	-10.1621626	3.91E-21	7.43E-19	37.30387537
ACAP2	1.153642188	8.523728124	10.15305301	4.19E-21	7.83E-19	37.23495445
RBM41	-0.626664575	4.092894773	-10.14205181	4.56E-21	8.44E-19	37.15176303
HIC2	1.09433374	6.152346837	10.13467294	4.83E-21	8.78E-19	37.09598885
TPR	-1.316821705	6.604956748	-10.12452553	5.22E-21	9.41E-19	37.01932136
RHOA	-0.969102815	8.90421099	-10.08024121	7.33E-21	1.30E-18	36.68518583
LSM1	-0.778026749	7.686307048	-10.05680206	8.77E-21	1.54E-18	36.50862932
TANK	-1.639967265	7.278665876	-10.05322671	9.02E-21	1.57E-18	36.48171599
OSTF1	-1.162777911	8.396339201	-10.03458266	1.04E-20	1.80E-18	36.3414518
MED9	0.617910099	4.574671074	10.03154706	1.06E-20	1.82E-18	36.31862665
MGC12488	-1.083709635	3.984829648	-10.0235899	1.13E-20	1.92E-18	36.25881193
INO80	-0.825276065	4.367419907	-10.0220909	1.14E-20	1.93E-18	36.24754655
ADCY3	0.885271892	5.968118337	10.01374495	1.22E-20	2.04E-18	36.18483988
MSI1	-0.598823884	2.75377872	-9.958638598	1.86E-20	3.08E-18	35.771469
CCDC13	-0.686244584	3.068677566	-9.929951807	2.31E-20	3.80E-18	35.55674097
LIMK2	1.1575015	9.707252928	9.920302144	2.49E-20	4.03E-18	35.48458213
WBP11	-1.104692122	6.484099411	-9.899611564	2.91E-20	4.68E-18	35.32998246
ZNF430	-1.270713676	4.327801479	-9.876608173	3.47E-20	5.49E-18	35.15829686
CRLS1	1.185704289	8.904888944	9.849628627	4.25E-20	6.69E-18	34.95719857
C1orf68	0.862283338	3.893371721	9.795165251	6.43E-20	1.00E-17	34.55211513
PDAP1	-1.029329012	6.078292921	-9.787817731	6.79E-20	1.05E-17	34.4975561
SUMO2	-0.877669516	9.472201725	-9.780385362	7.19E-20	1.10E-17	34.44238885
G2E3	-1.435221353	5.48612258	-9.774043054	7.54E-20	1.15E-17	34.39533001
FOXO1	-1.114124803	5.144254121	-9.766893224	7.96E-20	1.20E-17	34.34229871
ZNF148	-1.345332052	6.264020655	-9.757816486	8.52E-20	1.28E-17	34.27500462
RUFY2	-0.674986781	2.815394282	-9.733064819	1.03E-19	1.53E-17	34.09166546
RPS7	-0.95630848	10.71132451	-9.732078641	1.03E-19	1.53E-17	34.08436578
SLC1A4	1.111172869	6.453035013	9.72337714	1.10E-19	1.62E-17	34.01997431
CORT	-0.881058612	4.0580629	-9.718079478	1.15E-19	1.68E-17	33.9807863
CXCR4	-1.461176832	7.499749529	-9.705630769	1.26E-19	1.83E-17	33.88874482
NDRG3	0.727914951	9.641750285	9.696239158	1.35E-19	1.95E-17	33.81934785
C7orf54	1.13436213	5.003153638	9.656316949	1.83E-19	2.61E-17	33.52475116
ATG2B	-1.070151342	3.771061845	-9.655703979	1.84E-19	2.61E-17	33.52023294
ARPC5	-1.152422967	7.369384767	-9.653534733	1.87E-19	2.63E-17	33.50424457
ERH	-0.84670453	8.327310529	-9.588634333	3.04E-19	4.23E-17	33.02678828
TTN	-0.798845567	2.91865369	-9.578520937	3.27E-19	4.53E-17	32.9525424
MRPL50	-0.792482524	2.730989952	-9.536848416	4.47E-19	6.10E-17	32.64705692
ZNF91	-1.611611482	4.208588061	-9.516490307	5.20E-19	7.05E-17	32.49808186
UBTF	-0.64937259	6.332335726	-9.481530749	6.75E-19	9.09E-17	32.2426619
ACSS1	1.038304479	8.418534351	9.474412527	7.11E-19	9.52E-17	32.19071795
PCBP1	-0.705106597	9.781654043	-9.447268041	8.70E-19	1.14E-16	31.99283202
C22orf36	-0.710027801	4.179845589	-9.430581051	9.85E-19	1.28E-16	31.87133695
LOC285178	-1.142854859	3.508480547	-9.416472059	1.09E-18	1.40E-16	31.76870406
KLF12	-0.648735374	2.985174005	-9.40293132	1.21E-18	1.53E-16	31.67028449
ZFR	-0.914036679	4.7428678	-9.400364826	1.23E-18	1.55E-16	31.65163899
CXorf40A	-1.375166597	5.087646409	-9.395888514	1.27E-18	1.59E-16	31.61912545
PPM1K	1.599723593	6.733916599	9.353791809	1.74E-18	2.16E-16	31.31377725
TMCO3	-0.949646855	4.332290822	-9.335431711	1.99E-18	2.44E-16	31.180841
ANKRD11	-1.259144261	5.911094077	-9.319106351	2.24E-18	2.74E-16	31.06275957
LOC100289246	-1.35833713	6.120293451	-9.312456782	2.36E-18	2.86E-16	31.01469627
LOC100129917	-0.869063176	3.065425933	-9.304746251	2.49E-18	2.99E-16	30.95898832
CAPN7	-0.770736295	4.905656424	-9.295585442	2.67E-18	3.18E-16	30.8928358
MX2	1.320847114	10.76457407	9.275078523	3.10E-18	3.68E-16	30.7448826
PLCL2	0.762074217	11.11355033	9.269049652	3.24E-18	3.82E-16	30.70142044
HNRNPU	-0.879346109	10.25256082	-9.242083403	3.95E-18	4.63E-16	30.50721535
C7orf52	0.605971457	5.329850045	9.218977958	4.68E-18	5.43E-16	30.341069
SDHB	-0.719495858	8.098726187	-9.197546876	5.48E-18	6.31E-16	30.18717313
GNL2	-0.843800723	8.077202922	-9.159734325	7.22E-18	8.18E-16	29.91613893
SIPA1L3	-0.627509386	5.379342047	-9.13755726	8.49E-18	9.51E-16	29.7574736
PPP4R1L	0.591309845	3.672890763	9.118989051	9.71E-18	1.08E-15	29.62479701
NDST1	0.971478616	4.984853196	9.091696844	1.18E-17	1.31E-15	29.4300654
ZNF654	-1.053186045	3.09772999	-9.059326489	1.50E-17	1.65E-15	29.19953668
ARPC4	-0.983671825	7.173820692	-9.036291479	1.77E-17	1.93E-15	29.03577992
CGB /// CGB5	0.764971967	4.785589735	9.025252442	1.92E-17	2.08E-15	28.9573886
TRAF3IP2	1.184304483	5.2243315	9.006300142	2.20E-17	2.37E-15	28.82293273
COIL	-0.923037217	4.575832501	-9.005992251	2.20E-17	2.37E-15	28.82074978
APLP2	-0.592393079	10.95311003	-9.001408882	2.28E-17	2.44E-15	28.78825869
TUG1	-0.786000799	8.506501616	-8.985011586	2.57E-17	2.73E-15	28.67209862
GPT	0.670666236	5.562905884	8.981333186	2.63E-17	2.79E-15	28.64605743
FAM102B	-1.187210478	5.24544085	-8.934613716	3.69E-17	3.86E-15	28.31585023
DPP9	0.788489989	6.465585044	8.929371968	3.83E-17	3.98E-15	28.27886521
ZDHHC18	-0.669561384	4.556857881	-8.929146979	3.84E-17	3.98E-15	28.27727801
SAMHD1	1.598926761	4.744470018	8.925162945	3.95E-17	4.07E-15	28.24917618
SFRS4	-0.843068756	5.912675469	-8.913195104	4.30E-17	4.42E-15	28.16480405
KAT5	-1.057343561	5.044181383	-8.887189887	5.19E-17	5.30E-15	27.98169968
SNRNP40	-1.289640962	5.612818141	-8.88240249	5.37E-17	5.45E-15	27.94802573
SBNO1	0.682420803	4.209313826	8.864097078	6.12E-17	6.16E-15	27.8193667
XRN2	-0.872222651	7.163997099	-8.857387022	6.42E-17	6.43E-15	27.77224463
RAB14	-0.62120605	7.001180218	-8.835299716	7.52E-17	7.50E-15	27.61728375
LOC729806	-0.769037818	3.861917065	-8.828601248	7.89E-17	7.83E-15	27.57033383
FRYL	-1.011775458	4.863421619	-8.824657034	8.11E-17	8.01E-15	27.54269853
ID2	-0.988043126	7.344661236	-8.822147067	8.26E-17	8.12E-15	27.52511617
PPIB	-0.903021118	9.190963118	-8.804503889	9.37E-17	9.08E-15	27.40160949
CYB5R3	-0.879645088	3.763572805	-8.798790766	9.76E-17	9.42E-15	27.36164781
VTI1A	-1.092956547	7.174217571	-8.788349041	1.05E-16	1.01E-14	27.2886509
BCL11B	-1.334317673	7.989398991	-8.771995221	1.18E-16	1.13E-14	27.17442739
ZNF37A	-1.00697653	6.476366745	-8.771116054	1.19E-16	1.13E-14	27.16829044
BTF3	-0.935665238	11.59060755	-8.766790017	1.23E-16	1.16E-14	27.13809829
TARP /// TRGV3 /// TRGV5	-0.656473703	3.095763814	-8.758313775	1.30E-16	1.23E-14	27.07896704
HCST	-0.88611073	7.753671962	-8.754448247	1.34E-16	1.26E-14	27.05201206
ASAH1	-1.466614647	7.246506563	-8.740517422	1.48E-16	1.37E-14	26.95492934
C18orf21	-0.863108708	7.428954299	-8.714328781	1.78E-16	1.64E-14	26.77267485
LOC100294050 /// POM121L10P /// POM121L1P /// POM121L4P /// POM121L8P /// POM121L9P	0.900761328	3.588314093	8.712825104	1.80E-16	1.65E-14	26.76222032
FAM107B	-0.757610991	8.919457643	-8.693161216	2.07E-16	1.89E-14	26.62560465
AP1M1	0.935400312	8.39695423	8.67568405	2.34E-16	2.12E-14	26.50433805
TRIM11	0.63189868	6.835127355	8.672315133	2.40E-16	2.16E-14	26.48097957
PCBP2	-0.931117221	10.10996328	-8.666161715	2.50E-16	2.25E-14	26.43832887
RORA	-1.012201593	3.398143667	-8.634514959	3.13E-16	2.77E-14	26.21926879
LOC340107	0.710449659	5.938696246	8.610954141	3.70E-16	3.25E-14	26.05649693
THOC6	-0.774799321	4.458065173	-8.591414226	4.24E-16	3.71E-14	25.92170992
OSBP	0.902060504	7.297851213	8.579961152	4.60E-16	3.94E-14	25.84279336
ADRBK1	-1.004584966	5.573341048	-8.579839197	4.60E-16	3.94E-14	25.84195338
BAIAP2L1	0.635022914	4.505146176	8.551021326	5.63E-16	4.81E-14	25.64367352
H2AFZ	-0.811907965	9.16410654	-8.535990718	6.26E-16	5.32E-14	25.54041901
KIAA0892	0.733743615	6.600245407	8.519839098	7.01E-16	5.93E-14	25.4295884
LYST	0.954770239	7.595230133	8.507460435	7.64E-16	6.42E-14	25.34473514
RAB6A	-0.693213895	4.233407613	-8.481552641	9.16E-16	7.63E-14	25.16738954
FAM131A	0.916342509	8.059786877	8.48004563	9.25E-16	7.65E-14	25.15708398
LOC153684	-0.67300042	2.565277926	-8.476048178	9.51E-16	7.83E-14	25.12975324
P2RY10	-0.956697208	5.007057474	-8.467946	1.01E-15	8.25E-14	25.07438289
GPSM2	-0.981803117	4.885909679	-8.458213697	1.08E-15	8.76E-14	25.00791573
IL6R	-1.131054403	9.083213844	-8.457726058	1.08E-15	8.76E-14	25.00458664
UXT	-0.964881564	9.137187889	-8.452008215	1.12E-15	9.08E-14	24.96555997
DDX17	-0.99202115	6.702886745	-8.427877187	1.33E-15	1.07E-13	24.80103675
ZNF254	1.510298118	6.733488864	8.424586176	1.36E-15	1.09E-13	24.77862167
CUL4A	-1.257677601	5.983555824	-8.417489548	1.43E-15	1.14E-13	24.73030512
NFAT5	-0.927200605	2.615153624	-8.416010916	1.45E-15	1.14E-13	24.72024123
ZFYVE27	0.639057133	7.813076985	8.389018853	1.74E-15	1.36E-13	24.53672189
FBXO38	0.998365214	7.044588701	8.372341436	1.96E-15	1.52E-13	24.42351669
ZNF764	0.613973422	4.998626562	8.356967418	2.18E-15	1.68E-13	24.31928426
CAPZB	0.6185044	10.09849243	8.350578614	2.27E-15	1.74E-13	24.27600503
ELL	-1.137152421	2.882831832	-8.327065047	2.68E-15	2.04E-13	24.11689845
PEA15	-0.612813468	4.18257597	-8.326175416	2.69E-15	2.05E-13	24.11088424
RPL22L1	1.015847651	7.3308126	8.313713124	2.93E-15	2.22E-13	24.02667761
RPL36AL	-0.593475409	11.61370363	-8.308210246	3.05E-15	2.28E-13	23.98952052
PCNXL3	-0.632388457	4.105778311	-8.284816694	3.58E-15	2.66E-13	23.83173417
RNF5	0.696569607	7.174432447	8.278030375	3.75E-15	2.77E-13	23.78601417
MFSD6	-0.596768721	2.647986536	-8.24676512	4.65E-15	3.40E-13	23.57568524
FTSJD2	1.243596876	7.80653652	8.236669377	4.98E-15	3.61E-13	23.50787702
LOC100134937	-0.913142288	6.202331319	-8.235508915	5.02E-15	3.63E-13	23.50008615
NFX1	-0.900461202	6.055656605	-8.233691007	5.09E-15	3.66E-13	23.48788287
DHX33	0.861347465	6.449647405	8.227894807	5.29E-15	3.80E-13	23.44898552
OR4D1	0.676871449	4.379877584	8.225943387	5.36E-15	3.84E-13	23.4358938
HSPD1	-1.086494108	7.491571851	-8.196698526	6.55E-15	4.67E-13	23.23993329
RNF146	-1.364566981	4.97209894	-8.194614444	6.65E-15	4.72E-13	23.22598559
KCTD10	0.776340709	6.794996748	8.170148118	7.85E-15	5.56E-13	23.06241501
CD9	-1.347103695	7.327467305	-8.138588979	9.74E-15	6.80E-13	22.85188987
RPS4Y1	-4.494573058	3.403197912	-8.134529612	1.00E-14	6.97E-13	22.82484872
POLG	-0.640171966	7.757047919	-8.124488733	1.07E-14	7.41E-13	22.75799959
PTMA	-0.682321764	11.82348286	-8.119288123	1.11E-14	7.65E-13	22.72339648
HNRNPR	-1.081369602	5.996970237	-8.11841074	1.12E-14	7.67E-13	22.71756008
HCP5	0.94492996	9.28797261	8.106252345	1.21E-14	8.31E-13	22.63672377
HMGB1	-0.662233929	9.70216443	-8.089814484	1.36E-14	9.25E-13	22.52755977
RBM5	-0.923765481	9.180395113	-8.08877375	1.37E-14	9.29E-13	22.52065308
IGFN1	0.628518852	4.695685854	8.079652162	1.45E-14	9.85E-13	22.46014357
CYorf15A	-2.352219832	2.814605624	-8.07917968	1.46E-14	9.85E-13	22.45701049
TOR1AIP2	0.822026817	5.336832284	8.070992593	1.54E-14	1.03E-12	22.40273996
SEMA4C	1.026490132	5.24359076	8.060801353	1.65E-14	1.10E-12	22.33523429
ITFG1	0.716591247	7.815670401	8.045571798	1.83E-14	1.21E-12	22.23445885
C1orf131	-0.871870856	6.392955203	-8.034934713	1.97E-14	1.30E-12	22.1641459
LOC283403	1.022398011	4.429179418	8.024721149	2.11E-14	1.38E-12	22.09668964
BIRC6	-0.756613207	7.577268034	-8.021069726	2.16E-14	1.41E-12	22.07258713
SYNGAP1	0.677032585	5.137187877	8.012325815	2.29E-14	1.49E-12	22.01489901
BRAF	1.05539184	5.997120193	8.01132351	2.31E-14	1.49E-12	22.00828892
CCDC99	-0.607959339	2.719653475	-8.006159823	2.39E-14	1.54E-12	21.97424352
BAX	-0.994829904	6.264905769	-7.998680648	2.51E-14	1.61E-12	21.92495704
NAP1L5	0.85382728	3.965658644	7.990128748	2.66E-14	1.70E-12	21.86863847
AK2	-0.931660594	6.017074719	-7.98442142	2.76E-14	1.76E-12	21.83107483
TMCO1	0.610585384	5.994944418	7.977554954	2.89E-14	1.84E-12	21.78590549
ARMCX6 /// LOC653354	0.73744898	9.988870084	7.964554539	3.16E-14	2.00E-12	21.7004554
EIF4B	-1.017091427	9.385614281	-7.963571031	3.18E-14	2.00E-12	21.69399465
CTDP1	0.71520387	5.678868726	7.943714851	3.63E-14	2.28E-12	21.56367008
PCF11	-0.611718647	8.62155513	-7.931685638	3.94E-14	2.45E-12	21.48482153
CHMP5	1.138384509	9.548512901	7.920341119	4.25E-14	2.63E-12	21.41053324
CD44	-1.02351603	8.054946615	-7.909432688	4.57E-14	2.82E-12	21.3391669
ANXA8 /// ANXA8L1 /// ANXA8L2 /// LOC653110	0.643491398	3.510791011	7.902106167	4.80E-14	2.94E-12	21.29127105
SEC23IP	-1.078105452	6.257756879	-7.901194664	4.83E-14	2.95E-12	21.28531431
CLPTM1L	0.736016831	8.623822664	7.889484157	5.22E-14	3.19E-12	21.20882582
STAT5B	1.349631407	5.917043967	7.888365266	5.26E-14	3.20E-12	21.20152159
ITGA4	-1.031166723	3.591139248	-7.880331699	5.55E-14	3.35E-12	21.14909787
BRP44	0.679422683	7.880186852	7.864636501	6.16E-14	3.69E-12	21.04677985
THOC2	-0.960115159	5.510057756	-7.857199471	6.48E-14	3.87E-12	20.99834471
MFNG	-0.802456963	4.307749748	-7.84625232	6.96E-14	4.15E-12	20.92710469
GRB2	-1.242097583	6.015113907	-7.843726002	7.08E-14	4.21E-12	20.91067373
ZC3H7A	-0.628180943	6.718810543	-7.83293607	7.61E-14	4.51E-12	20.84053664
MAFG	1.022537599	6.670693817	7.803898591	9.23E-14	5.41E-12	20.65210639
ADNP	-0.839369362	9.292821124	-7.790216001	1.01E-13	5.90E-12	20.56347947
APOL2	0.847281508	7.518209616	7.783183284	1.06E-13	6.17E-12	20.51796665
HBS1L	-0.822900773	4.954439863	-7.773131736	1.13E-13	6.55E-12	20.45296507
KLF5	0.685594727	6.712826629	7.771526492	1.14E-13	6.60E-12	20.44258945
EAPP	-0.679241189	8.117077214	-7.762684265	1.21E-13	6.98E-12	20.38546288
MAPKSP1	-0.720500007	8.001498137	-7.758142328	1.25E-13	7.17E-12	20.35613599
APOL6	1.049532481	10.301326	7.752038843	1.30E-13	7.45E-12	20.31674449
POLR2J	-0.924454629	8.892728724	-7.743070574	1.38E-13	7.88E-12	20.25890169
ASCC3	-0.742985063	4.593215515	-7.729254465	1.51E-13	8.59E-12	20.16987997
CDC37	-0.806969031	6.27936653	-7.722991984	1.57E-13	8.92E-12	20.12956406
AIDA	-1.160073595	3.856921019	-7.708925204	1.73E-13	9.73E-12	20.03908692
APBB3	0.587283945	5.803603542	7.678549168	2.11E-13	1.18E-11	19.84408972
LOC100288357	0.615965339	5.675958321	7.657407126	2.42E-13	1.35E-11	19.7086777
TOPORS	-0.997871778	5.834959333	-7.655956629	2.44E-13	1.36E-11	19.69939676
ING2	-0.621273691	4.724671209	-7.64843514	2.57E-13	1.42E-11	19.65128996
ACPT	0.646829132	5.828289751	7.639822271	2.72E-13	1.50E-11	19.59624229
MAP3K1	-0.952009682	4.336192762	-7.636066009	2.78E-13	1.53E-11	19.572248
M6PR	-1.035062018	6.465040285	-7.630020948	2.90E-13	1.59E-11	19.53365018
NDUFV2	-0.68176574	7.617533373	-7.629319613	2.91E-13	1.59E-11	19.52917349
FBL	-0.915161525	8.872106518	-7.624853264	3.00E-13	1.63E-11	19.50067094
STAM2	0.745537993	5.492277541	7.615280235	3.19E-13	1.73E-11	19.43961783
TTF1	-0.915357994	6.357489527	-7.613733119	3.22E-13	1.74E-11	19.42975583
TRMT6	-0.831810816	5.297943222	-7.610063422	3.30E-13	1.78E-11	19.40636902
KDM5D	-3.297773502	3.063676013	-7.571753122	4.23E-13	2.27E-11	19.16267976
PAK1IP1	-0.843358675	6.378868776	-7.56550444	4.41E-13	2.36E-11	19.12301221
XIST	3.635588401	8.743782225	7.560186467	4.57E-13	2.43E-11	19.08927063
ZNF12	-1.120972125	5.779767671	-7.552289087	4.81E-13	2.54E-11	19.03919323
ARRB1	-0.951567243	4.640149418	-7.551219753	4.84E-13	2.55E-11	19.03241533
ORC2L	0.659131538	8.054869239	7.550939122	4.85E-13	2.55E-11	19.03063668
CYFIP1	0.711448492	8.243155165	7.542401781	5.12E-13	2.68E-11	18.97654837
LCE1E	-0.590963992	2.738679902	-7.521191788	5.88E-13	3.06E-11	18.8423547
NCRNA00185	-1.329948485	2.602214688	-7.511760559	6.25E-13	3.24E-11	18.78276779
PTPLA	0.866357893	4.183499258	7.488600277	7.26E-13	3.73E-11	18.63665912
NDEL1	0.671677245	9.199702804	7.472548913	8.05E-13	4.11E-11	18.53558067
NUDT21	-0.847875383	6.497187255	-7.451989426	9.19E-13	4.66E-11	18.4063332
MRPL36	-0.868103062	7.392520381	-7.444470147	9.64E-13	4.83E-11	18.35912485
SSRP1	-0.862408348	6.250551462	-7.442342725	9.77E-13	4.88E-11	18.34577425
CASS4	-0.939703884	3.171406323	-7.437365714	1.01E-12	5.00E-11	18.31455144
NUDT1	-0.655044325	5.670135425	-7.433926258	1.03E-12	5.09E-11	18.29298282
SELL	0.692337237	12.1231365	7.42115064	1.12E-12	5.50E-11	18.21292844
ZWINT	1.08659615	5.004192857	7.41790314	1.14E-12	5.61E-11	18.19259428
UBR1	0.759811744	8.770982862	7.398028103	1.30E-12	6.32E-11	18.06828222
EIF1AY	-3.394566539	3.127160434	-7.3892075	1.37E-12	6.67E-11	18.01318667
PMS2L3	-0.759190556	5.848094485	-7.378208385	1.47E-12	7.13E-11	17.94454794
RAB2A	0.628658404	8.695080164	7.376926006	1.49E-12	7.17E-11	17.93655005
MINK1	0.81603717	6.827763518	7.35848646	1.67E-12	8.03E-11	17.82165456
NUDT15	0.752547655	5.689604334	7.352645555	1.74E-12	8.31E-11	17.78530228
VPS33A	0.60999663	7.215484387	7.333421535	1.96E-12	9.33E-11	17.66579994
MUL1	0.634111741	6.589190807	7.327785862	2.03E-12	9.65E-11	17.63080851
NOMO1 /// NOMO2 /// NOMO3	-0.720430832	8.018708726	-7.318195936	2.16E-12	1.02E-10	17.57130889
SRRM1	-0.922719429	6.859831381	-7.315389015	2.20E-12	1.04E-10	17.55390404
ARL16	0.743069843	7.259646355	7.313696484	2.22E-12	1.05E-10	17.54341143
MED23	-0.922064724	7.409502991	-7.2955897	2.49E-12	1.17E-10	17.43126802
COPE	-0.707830158	6.618846852	-7.283238066	2.70E-12	1.27E-10	17.35488122
SYNCRIP	-0.867959359	3.92420572	-7.279618236	2.76E-12	1.29E-10	17.33251223
CCDC58	-1.041897966	6.295577886	-7.273520388	2.87E-12	1.34E-10	17.29484792
SERPINB1	-0.783627881	9.35562666	-7.271077248	2.91E-12	1.35E-10	17.27976373
IQGAP2	-0.780702061	7.760579128	-7.266298648	3.00E-12	1.39E-10	17.25027054
GABPB1	-0.977107939	5.751469589	-7.266033607	3.01E-12	1.39E-10	17.24863512
FADS2	0.589001053	4.679274141	7.265355606	3.02E-12	1.40E-10	17.24445177
KPNA2	0.907950492	6.898047579	7.256192899	3.20E-12	1.47E-10	17.18794369
7-Sep	-0.95361455	7.885476584	-7.247811293	3.37E-12	1.54E-10	17.136297
SUPT16H	0.608919695	8.586701848	7.241681179	3.51E-12	1.59E-10	17.09855055
CCL4	-0.748342972	5.44825857	-7.225122833	3.89E-12	1.76E-10	16.99670496
CBX1	0.642895746	8.882882167	7.203425143	4.46E-12	2.01E-10	16.86349931
C6orf150	1.198768708	4.125793073	7.201130741	4.53E-12	2.04E-10	16.84943025
FNTB	-0.606442399	3.274921163	-7.20010548	4.56E-12	2.05E-10	16.84314448
ETFA	-0.679546304	7.863718767	-7.19252906	4.78E-12	2.13E-10	16.79671393
STX11	-0.646889303	4.318027635	-7.192337508	4.79E-12	2.13E-10	16.79554049
DNAJB6 /// TMEM135	-0.843502011	8.386730986	-7.178603963	5.22E-12	2.32E-10	16.71146758
PTGDR	-1.340242748	4.208481978	-7.176883839	5.27E-12	2.34E-10	16.70094553
CTSC	-0.883963152	7.592801809	-7.175884829	5.31E-12	2.35E-10	16.69483539
TACC1	-0.899446158	5.406430968	-7.174194501	5.36E-12	2.37E-10	16.68449838
RNF8	-0.902281132	5.087606347	-7.169664167	5.52E-12	2.43E-10	16.6568022
NGFRAP1	0.898118259	6.745654704	7.165544138	5.66E-12	2.48E-10	16.63162527
FLJ39653	1.043060359	5.425175017	7.16005939	5.86E-12	2.56E-10	16.59812474
STXBP3	0.813259743	4.172843297	7.148102846	6.31E-12	2.76E-10	16.52515837
GLG1	-1.043116086	6.693003263	-7.147193552	6.35E-12	2.77E-10	16.51961286
UXS1	-0.869503819	6.724222696	-7.145219572	6.43E-12	2.80E-10	16.50757586
FAM83G	0.617276351	4.478680718	7.139545256	6.66E-12	2.89E-10	16.47298809
PLEKHA1	-1.123641965	4.246177104	-7.122629478	7.40E-12	3.19E-10	16.36999478
YAF2	-0.628360356	4.737718275	-7.120529054	7.50E-12	3.22E-10	16.35721836
TECPR1	0.659844677	8.081115801	7.117691355	7.63E-12	3.27E-10	16.33996155
TMEM184B	0.740998722	6.318934872	7.108099544	8.10E-12	3.46E-10	16.2816677
PLEKHN1	0.60836207	5.650966061	7.101908725	8.42E-12	3.57E-10	16.2440732
LOC100129196	-0.703863895	2.716375593	-7.082681055	9.49E-12	4.01E-10	16.1274609
SMCR7	0.750572084	5.571920091	7.067972297	1.04E-11	4.37E-10	16.03840852
PPP3CC	-0.8785546	7.438554324	-7.061447153	1.08E-11	4.54E-10	15.99894554
MFSD5	-0.675662652	6.049821694	-7.05852486	1.10E-11	4.61E-10	15.98128051
KLHL9	-0.851898834	4.928331202	-7.058196997	1.11E-11	4.61E-10	15.97929894
LIPT1	-0.846000987	5.514530224	-7.045896053	1.19E-11	4.96E-10	15.90500104
YIPF1	0.592728576	9.713476275	7.034145927	1.28E-11	5.32E-10	15.83411748
ABCB1 /// ABCB4	-1.141699039	4.842677257	-7.027692956	1.33E-11	5.53E-10	15.79522578
ELMO1	-0.883802238	6.161548274	-7.020352737	1.40E-11	5.77E-10	15.75101808
TGOLN2	0.656474545	7.797110925	7.019420694	1.40E-11	5.79E-10	15.74540709
LOC728903 /// MGC21881	1.013697844	6.138457722	7.014235769	1.45E-11	5.97E-10	15.71420315
RBBP4	-0.977158972	6.646827689	-7.012765372	1.46E-11	6.01E-10	15.70535704
SLC16A6	-0.931728284	7.034220509	-7.00545592	1.53E-11	6.26E-10	15.66140231
PQBP1	-0.785512704	8.86937514	-6.996705153	1.62E-11	6.57E-10	15.60882405
CCNL1	-0.681992046	10.1503872	-6.99278218	1.66E-11	6.72E-10	15.58526866
ZNF765	0.655436128	4.496770364	6.989394569	1.69E-11	6.85E-10	15.56493555
MTHFD2	0.685507908	6.832774939	6.983013328	1.76E-11	7.11E-10	15.52665351
CDC42SE2	-0.898637824	8.223666928	-6.974086416	1.86E-11	7.48E-10	15.47314221
PUM1	-0.662141026	6.349870233	-6.964270805	1.97E-11	7.93E-10	15.41436114
SRP54	-0.632487182	7.232413165	-6.955802869	2.08E-11	8.32E-10	15.36369906
ZCCHC14	-0.852711013	5.167973516	-6.953033682	2.11E-11	8.45E-10	15.34714127
LRFN1	0.896091343	6.776536257	6.952033644	2.13E-11	8.48E-10	15.34116292
NFIC	-0.698618897	5.310384741	-6.946645261	2.20E-11	8.75E-10	15.30896131
PPA2	0.81616279	4.930338048	6.945743505	2.21E-11	8.78E-10	15.30357409
LOC494150	-0.840202805	3.819434057	-6.936390256	2.34E-11	9.28E-10	15.24772646
ALDOA	-0.77485651	10.33311818	-6.934451067	2.37E-11	9.38E-10	15.23615456
MTPN	-1.254335738	6.830957958	-6.919197432	2.60E-11	1.02E-09	15.1452125
ZNF33A /// ZNF33B	-0.646520211	2.917688008	-6.903319503	2.87E-11	1.12E-09	15.05070383
LOC642852	-0.842257142	3.766561984	-6.900177285	2.92E-11	1.14E-09	15.03201953
FAM60A /// LOC728115	-0.62243189	5.032666552	-6.897898853	2.96E-11	1.15E-09	15.01847538
PION	-0.880719883	8.764873461	-6.885686543	3.19E-11	1.23E-09	14.94593507
CTAGE5	-0.932964385	4.702508741	-6.874907679	3.41E-11	1.31E-09	14.88198759
TRIM5	1.235183056	8.215724762	6.872123532	3.47E-11	1.33E-09	14.8654821
FRG1B	0.873493387	6.034864568	6.864187743	3.64E-11	1.39E-09	14.81846261
STAT1	0.93233869	9.868073352	6.858902022	3.76E-11	1.44E-09	14.78716688
SYNGR2	0.637811071	8.514642283	6.853363589	3.89E-11	1.48E-09	14.7543939
LOC100128108 /// LOC400464	-0.816366568	5.169701831	-6.850178283	3.96E-11	1.50E-09	14.73555406
EMR2	-1.287945181	8.190331607	-6.84312979	4.13E-11	1.56E-09	14.69388788
KLF3	-0.689429929	4.649827992	-6.841983468	4.16E-11	1.57E-09	14.68711454
ADPRHL2	0.66951645	9.143205701	6.838463728	4.25E-11	1.60E-09	14.66632246
CEP110	-0.644403538	6.659333337	-6.829672188	4.49E-11	1.68E-09	14.61442281
CASP6	-0.663489408	4.70421313	-6.825300511	4.61E-11	1.72E-09	14.58863351
RRAGD	1.047730958	7.687712284	6.811266364	5.01E-11	1.86E-09	14.50592586
ZNF227	-0.717352072	3.478462469	-6.810309743	5.04E-11	1.87E-09	14.50029277
FCGR2A	1.289611257	5.582606497	6.805904689	5.18E-11	1.92E-09	14.47436098
LMO2	0.637478033	8.932804078	6.797650822	5.44E-11	2.01E-09	14.42580524
PDE7A	0.889505935	7.919110567	6.795616377	5.51E-11	2.03E-09	14.41384372
RNF169	0.635620978	8.596998345	6.792220932	5.63E-11	2.07E-09	14.3938861
ELP2	0.779600024	8.526124049	6.786666524	5.82E-11	2.13E-09	14.36125448
ANKRD36B	-1.068976822	7.564156315	-6.784091448	5.91E-11	2.16E-09	14.34613286
CCDC137	-0.663251392	5.636759928	-6.78252226	5.97E-11	2.17E-09	14.33692019
PPP2R5B	0.691286256	5.067566719	6.764720845	6.64E-11	2.41E-09	14.23251894
ZNF800	-0.796079475	6.651241507	-6.75915699	6.87E-11	2.48E-09	14.19992989
CYorf15B	-2.09197176	2.89861037	-6.757209534	6.95E-11	2.51E-09	14.18852778
TMEM106A	-0.748902721	6.17673484	-6.745099136	7.47E-11	2.69E-09	14.11767769
HP1BP3	1.085169166	7.499873994	6.743663323	7.54E-11	2.70E-09	14.10928393
PPIL4	-0.735822465	5.630528441	-6.741739071	7.62E-11	2.73E-09	14.09803683
RNF125	0.996052135	5.782117967	6.73826897	7.78E-11	2.78E-09	14.0777604
CERK	-0.660336635	6.781571695	-6.736914026	7.85E-11	2.80E-09	14.06984533
HLA-DRA	-0.943255665	10.59418986	-6.717978976	8.79E-11	3.13E-09	13.9593576
BTBD6	0.726776219	7.243077193	6.715347977	8.93E-11	3.17E-09	13.94402379
3-Mar	0.831772415	6.213509232	6.714319931	8.99E-11	3.18E-09	13.93803341
PEX5	0.774307636	6.942477718	6.709156425	9.27E-11	3.28E-09	13.90795622
CLN8	0.784071778	5.745943147	6.705575995	9.47E-11	3.33E-09	13.8871105
CSRNP1	0.955711794	5.176443813	6.703677177	9.58E-11	3.36E-09	13.8760587
CCDC90B	-0.784240941	4.551273336	-6.69213038	1.03E-10	3.57E-09	13.80890244
TTC19	-0.856186507	7.088128249	-6.670542751	1.17E-10	4.03E-09	13.68358034
CTSW	-1.285639863	8.313174342	-6.667713236	1.19E-10	4.09E-09	13.66717664
RBMS1	-0.683240919	8.137311978	-6.666137407	1.20E-10	4.11E-09	13.65804326
UTY	-0.986163416	3.695792053	-6.665440574	1.20E-10	4.12E-09	13.65400499
TRAPPC2L	-0.857697128	6.437762419	-6.663520672	1.22E-10	4.16E-09	13.64288043
EIF2C4	0.882806953	5.744813512	6.662207788	1.23E-10	4.18E-09	13.63527453
RPL32P3	0.676165878	5.500015364	6.658916874	1.25E-10	4.25E-09	13.61621426
TNFAIP1	0.650780304	7.561029187	6.657534785	1.26E-10	4.27E-09	13.6082116
NHEJ1	0.676479208	4.75636841	6.656498487	1.27E-10	4.29E-09	13.60221197
PSMF1	-1.077363087	8.874440157	-6.649495656	1.32E-10	4.45E-09	13.56168755
JAK2	1.151345806	5.731696681	6.63678466	1.43E-10	4.78E-09	13.48821235
ASTE1	-0.752005673	5.423246787	-6.632157673	1.47E-10	4.90E-09	13.46149246
HDAC2	-0.597936536	7.621040833	-6.631461266	1.47E-10	4.91E-09	13.45747206
PMS2	-0.687855899	6.045457205	-6.627301227	1.51E-10	5.01E-09	13.43346252
LYAR	-1.015577577	5.442078058	-6.626279128	1.52E-10	5.03E-09	13.42756523
ARMC7	0.633244723	6.094494253	6.622388336	1.55E-10	5.14E-09	13.40512247
LOC100292408	0.880510399	6.899329248	6.617536773	1.60E-10	5.27E-09	13.37715166
ABCF2	-0.874278812	5.321330873	-6.611715625	1.66E-10	5.44E-09	13.3436112
LOC493754	0.719011825	6.704898488	6.602109252	1.75E-10	5.74E-09	13.28830941
CD40	-0.852197402	4.998845429	-6.597465224	1.80E-10	5.89E-09	13.26159643
CALD1	-1.215234334	6.469603124	-6.593603665	1.84E-10	6.00E-09	13.23939505
SERPINF1	-0.71041196	3.845012165	-6.58915513	1.89E-10	6.15E-09	13.21383109
CYB5B	-0.688179254	4.797826454	-6.578854909	2.01E-10	6.53E-09	13.15468965
THOC1	-0.74802809	8.091567664	-6.557026607	2.29E-10	7.34E-09	13.02958717
DNAJA2	-0.777775866	7.12235683	-6.540890112	2.51E-10	8.04E-09	12.93730733
SND1	0.593554572	6.7298115	6.540319681	2.52E-10	8.05E-09	12.93404835
CXorf38	0.740035688	8.254544358	6.530876121	2.67E-10	8.50E-09	12.88012669
SRM	-0.607910498	5.31794895	-6.525652179	2.75E-10	8.73E-09	12.85032389
RRN3P1	-0.761094022	3.339756243	-6.522129643	2.81E-10	8.89E-09	12.83023786
NUPL2	-0.596772457	6.452785473	-6.517980954	2.88E-10	9.08E-09	12.80659195
BOD1L	-0.607080647	10.1173019	-6.517935227	2.88E-10	9.08E-09	12.80633139
TMEM62	0.716093558	6.391311975	6.514833578	2.93E-10	9.22E-09	12.78866073
TGDS	-0.835781902	5.203796694	-6.510857144	3.00E-10	9.42E-09	12.76601559
CREM	0.676785434	3.734111391	6.499558657	3.20E-10	1.00E-08	12.70172972
FAM8A1	0.784986701	8.909088613	6.492214803	3.34E-10	1.05E-08	12.65999024
FAM45A /// FAM45B	-0.609730213	8.1476087	-6.488791795	3.41E-10	1.07E-08	12.64054749
LOC100289061	0.866874138	6.44853975	6.487277834	3.44E-10	1.07E-08	12.63195065
ZNF445	0.669347474	5.932972946	6.481620405	3.56E-10	1.11E-08	12.59983911
KIAA1370	-0.95146247	6.560142894	-6.473790528	3.72E-10	1.15E-08	12.55543187
RPL29	-0.846654821	11.13036221	-6.472370258	3.76E-10	1.16E-08	12.54738117
IFT80	0.80876772	7.106583759	6.46389187	3.95E-10	1.22E-08	12.49934992
CXCL16	0.722103908	9.973141995	6.446984339	4.35E-10	1.34E-08	12.40370949
ZNF770	-1.028014375	4.185032924	-6.446492594	4.37E-10	1.34E-08	12.4009307
BTN3A3	0.687435703	9.362655936	6.444334665	4.42E-10	1.35E-08	12.38873843
NDUFV3	-0.628555192	4.356628926	-6.443718012	4.44E-10	1.36E-08	12.38525492
CBR4	0.605491084	8.168175863	6.432522603	4.74E-10	1.45E-08	12.32205557
NDUFB10	-0.697241915	6.92971141	-6.43247025	4.74E-10	1.45E-08	12.32176023
LOC285359 /// PDCL3	-0.914360351	5.469998943	-6.429960038	4.81E-10	1.46E-08	12.30760139
ZNF146	-0.69593593	3.44887757	-6.426632483	4.90E-10	1.49E-08	12.28883883
ZNF785	-0.671005645	5.074362466	-6.412391475	5.32E-10	1.61E-08	12.2086241
GANAB	-0.670256135	6.649309662	-6.406421294	5.51E-10	1.66E-08	12.17503655
TSIX	2.171624115	6.308364161	6.401718164	5.66E-10	1.70E-08	12.14859412
DOCK5	1.053453755	4.117425759	6.387699984	6.14E-10	1.84E-08	12.06986781
RAB1A	-1.057220708	5.227370397	-6.375755426	6.58E-10	1.96E-08	12.00289127
LHFPL2	0.938747931	7.933603162	6.370019518	6.80E-10	2.02E-08	11.97076255
CHKB-CPT1B /// CPT1B	0.871894648	10.00640533	6.365216341	6.99E-10	2.07E-08	11.94387543
TCEB2	-0.698729639	9.337270891	-6.362599687	7.10E-10	2.10E-08	11.92923452
LOC100216546	0.683887607	6.492755655	6.359929501	7.21E-10	2.12E-08	11.91429885
NDUFA13 /// YJEFN3	-0.759469699	8.357160845	-6.357748061	7.30E-10	2.14E-08	11.90210055
ULK3	0.601590106	5.020851622	6.348413218	7.70E-10	2.26E-08	11.84993774
LRMP	-0.692229794	9.199921876	-6.347778575	7.73E-10	2.26E-08	11.84639351
TLK2	-0.833274373	5.256984712	-6.343122328	7.94E-10	2.32E-08	11.82039856
TMEM154	-0.607093899	10.23016764	-6.329544952	8.58E-10	2.49E-08	11.74468235
LOC144571	-1.273377469	4.570125382	-6.328097981	8.65E-10	2.51E-08	11.73662046
MESDC1	-0.622331058	6.139358202	-6.322224496	8.95E-10	2.59E-08	11.70391056
VTA1	-0.725577442	5.384935044	-6.316110931	9.27E-10	2.68E-08	11.66988848
YWHAH	-0.726560912	6.429867941	-6.315867613	9.28E-10	2.68E-08	11.66853493
PHB2	-0.61477496	7.867674741	-6.304257764	9.92E-10	2.85E-08	11.60399767
SYMPK	-0.693263528	4.429553236	-6.299549505	1.02E-09	2.93E-08	11.57785133
TTPAL	0.887492442	5.30632903	6.289365923	1.08E-09	3.09E-08	11.52135045
LOC154761	0.861370774	6.204392741	6.277745178	1.15E-09	3.28E-08	11.4569621
TPK1	0.625252132	7.567122023	6.27259361	1.19E-09	3.36E-08	11.42844767
CCDC142 /// MRPL53	-0.672357419	6.102832131	-6.271551687	1.20E-09	3.37E-08	11.42268272
TRIM4	-0.766799162	6.615576691	-6.249586998	1.36E-09	3.80E-08	11.30132491
FBXO21	-1.069978352	5.032988667	-6.246459417	1.38E-09	3.86E-08	11.28407143
GOLGA4	-0.614912181	6.621622983	-6.211732366	1.68E-09	4.63E-08	11.09294785
C22orf37	0.748364988	6.227038968	6.211405373	1.68E-09	4.64E-08	11.09115214
C18orf49	1.500422871	6.70371026	6.205215396	1.74E-09	4.79E-08	11.05717331
SFXN2	0.634437328	7.021224958	6.204224687	1.75E-09	4.81E-08	11.05173743
PRF1	-1.065617239	5.883359407	-6.20238222	1.77E-09	4.85E-08	11.04162986
MAP4	-0.842364717	6.677138008	-6.199249699	1.80E-09	4.93E-08	11.02445056
RNF19B	-0.820529803	8.345449221	-6.187517868	1.93E-09	5.24E-08	10.96017111
LSM7	-0.783582698	4.548243338	-6.185716271	1.95E-09	5.29E-08	10.95030844
RNF126	-0.637555894	4.341286778	-6.181976116	1.99E-09	5.37E-08	10.92984047
IL1RN	0.713035011	11.50414477	6.180338455	2.01E-09	5.41E-08	10.92088141
C9orf91	0.92170489	7.013193085	6.179480038	2.02E-09	5.43E-08	10.91618606
PRDX3	-0.645968712	9.220461433	-6.171170087	2.11E-09	5.67E-08	10.87075873
GALK2	-0.690727521	4.647322424	-6.170270157	2.12E-09	5.68E-08	10.86584202
G3BP1	-0.680579886	3.979180987	-6.16098895	2.24E-09	5.96E-08	10.81516732
NHLRC3	-0.827351271	6.344074893	-6.160916651	2.24E-09	5.96E-08	10.81477281
NDUFB7	-0.770519321	7.370230294	-6.159602815	2.25E-09	5.99E-08	10.80760424
ZNF195	-0.836305917	5.809340535	-6.159439795	2.26E-09	5.99E-08	10.80671484
EDEM2	-0.650800819	8.25771323	-6.155414877	2.31E-09	6.11E-08	10.78476191
NCRNA00204	-0.707982235	7.058929694	-6.145907811	2.44E-09	6.41E-08	10.73295241
KIAA1012	-0.678716599	6.641019239	-6.145841561	2.44E-09	6.41E-08	10.73259159
LBH	-0.6735386	8.224081897	-6.139986513	2.52E-09	6.61E-08	10.70071545
BCCIP	0.724245472	6.131881055	6.122847781	2.77E-09	7.22E-08	10.60754508
RNF13	-0.831687141	9.402371231	-6.12174161	2.79E-09	7.25E-08	10.60153866
NUS1	-1.180823271	5.946500726	-6.100568189	3.14E-09	8.13E-08	10.48673258
GTF2F2	-0.718833866	5.141809161	-6.100550173	3.14E-09	8.13E-08	10.48663503
LOC285147	0.912405107	6.66942484	6.097280768	3.20E-09	8.22E-08	10.46893556
KIAA0247	-0.601462284	10.81548762	-6.084687802	3.43E-09	8.79E-08	10.400831
SLC6A16	0.943762984	6.882165568	6.08391078	3.44E-09	8.82E-08	10.39663238
SCNM1	-0.684355821	8.917082789	-6.08053067	3.51E-09	8.97E-08	10.37837291
ZNF673 /// ZNF674	-0.610353785	5.106138737	-6.079392839	3.53E-09	9.01E-08	10.3722281
PDZK1IP1	-1.630006903	9.300549916	-6.056867317	4.00E-09	1.02E-07	10.25076604
TRIM69	0.860154433	8.30411957	6.053014672	4.09E-09	1.04E-07	10.23002734
DNAJC13	0.931051546	4.766759455	6.033222485	4.57E-09	1.15E-07	10.12365027
CAMK1D	-0.950591471	5.607711166	-6.015662738	5.03E-09	1.27E-07	10.02950189
P4HA1	-0.728543007	5.654146534	-6.014094199	5.08E-09	1.27E-07	10.02110255
TBC1D9	-0.984908854	6.053412688	-6.007238659	5.27E-09	1.32E-07	9.984412221
CEP78	-0.71702681	3.794996083	-5.985645977	5.94E-09	1.46E-07	9.869066031
RNASEL	0.697188743	7.651338814	5.98153595	6.07E-09	1.50E-07	9.847147858
LOC100132999	0.637759103	10.3689242	5.979707534	6.14E-09	1.51E-07	9.837401014
MRPL41	-0.749993166	5.605324857	-5.965865188	6.62E-09	1.62E-07	9.763687373
VHL	1.168983504	3.809215861	5.957420355	6.94E-09	1.69E-07	9.718783215
ZMYM3	0.593399471	5.026255866	5.956856284	6.96E-09	1.69E-07	9.715785647
C2CD2L	0.762682817	7.982733856	5.945963977	7.39E-09	1.79E-07	9.657946273
ITGB2	-0.704580239	10.62197038	-5.942429701	7.53E-09	1.82E-07	9.639196924
C17orf37	0.732734171	6.823561335	5.919475863	8.54E-09	2.04E-07	9.517642317
GOLGA7	-0.792001677	5.845990333	-5.916621901	8.67E-09	2.07E-07	9.502554993
CLPX	0.638180573	6.129603834	5.903080604	9.34E-09	2.21E-07	9.431048537
PSME3	-0.716682519	6.134861023	-5.900123066	9.49E-09	2.24E-07	9.41544826
STK38	-0.716923186	5.827800839	-5.89023738	1.00E-08	2.36E-07	9.363348943
NFKBIZ	-0.909550898	6.994905928	-5.890160752	1.00E-08	2.36E-07	9.362945373
C14orf156	-0.589283626	7.613627843	-5.889474923	1.01E-08	2.36E-07	9.359333551
SFT2D3	-0.636192539	5.183987124	-5.882067168	1.05E-08	2.44E-07	9.320343054
MORC2	0.632867305	5.937376902	5.876093337	1.08E-08	2.51E-07	9.288928489
LOC153546	0.777352506	3.742747591	5.874669117	1.09E-08	2.53E-07	9.281442712
DIAPH2	-0.767943851	6.106528754	-5.865440118	1.15E-08	2.65E-07	9.232969694
UCP2	-0.793760449	8.57675943	-5.85722839	1.20E-08	2.77E-07	9.189890828
LRPPRC	0.889784766	6.247728201	5.854812106	1.21E-08	2.80E-07	9.177224143
N4BP2	-0.952822543	5.047199705	-5.84891704	1.25E-08	2.88E-07	9.146338472
TTLL3	-0.847920323	4.216348306	-5.847221563	1.26E-08	2.91E-07	9.137460066
ACLY	-0.695736663	6.789100103	-5.846599872	1.27E-08	2.91E-07	9.134205082
ATP6V0D1	-0.685623562	8.632967548	-5.829709501	1.39E-08	3.18E-07	9.045878276
SKI	-0.670757189	6.098340984	-5.826600033	1.41E-08	3.23E-07	9.029639872
HELLS	-0.849908613	3.21711572	-5.824334075	1.43E-08	3.25E-07	9.017810861
TRIM39	0.69630066	7.013923582	5.818781207	1.47E-08	3.35E-07	8.988838732
C1orf43	0.712342886	5.905352111	5.81463301	1.51E-08	3.41E-07	8.967209939
C17orf49	-0.76356075	7.697376026	-5.806185119	1.58E-08	3.56E-07	8.923200705
RAPGEF6	0.794652669	9.144205337	5.798793816	1.64E-08	3.69E-07	8.88473788
TUFT1	0.921070186	6.930969732	5.795363928	1.67E-08	3.75E-07	8.866902812
LOC645676	0.600167651	3.561039202	5.793403987	1.69E-08	3.78E-07	8.856715119
ACO1	0.8725525	5.187432621	5.792200241	1.70E-08	3.80E-07	8.850459471
BUB3	-0.858808232	7.857348835	-5.792117842	1.70E-08	3.80E-07	8.850031296
RAB11FIP2	-0.724859859	4.489068852	-5.789851087	1.72E-08	3.84E-07	8.838254353
NLGN3	-0.823530965	5.810505817	-5.784025675	1.78E-08	3.95E-07	8.808005369
MAST3	-0.860469762	8.026699685	-5.783107361	1.79E-08	3.96E-07	8.803239174
ZNF720	0.634606299	6.584282241	5.780581111	1.81E-08	4.00E-07	8.790130676
LOC100294335 /// LRRC37A /// LRRC37A2 /// LRRC37A3 /// LRRC37A4	-0.86705916	9.310781494	-5.779488971	1.82E-08	4.02E-07	8.784465075
SEC23B	0.67548955	5.06517309	5.77679501	1.85E-08	4.07E-07	8.770493534
OAS1	2.137053176	8.926425535	5.771032914	1.91E-08	4.19E-07	8.740627485
ANXA5	-0.594135592	7.594560389	-5.765732254	1.96E-08	4.29E-07	8.713174321
MAP2K1	0.680471208	9.327147021	5.764960925	1.97E-08	4.30E-07	8.709181151
IER5	0.677428632	8.304483905	5.759425007	2.03E-08	4.41E-07	8.680534311
ODZ1	0.604659127	3.705561831	5.750749717	2.13E-08	4.59E-07	8.635686678
MEST	-0.850251518	3.687608351	-5.749167319	2.14E-08	4.63E-07	8.62751222
LST1	-0.602045209	10.90800838	-5.743073548	2.21E-08	4.76E-07	8.596049525
FBXO6	1.324795091	5.493261135	5.74264251	2.22E-08	4.77E-07	8.593825053
TCF25	-0.656637276	8.572568036	-5.741220314	2.24E-08	4.80E-07	8.58648644
ZKSCAN1	-0.863343174	6.421378584	-5.727917888	2.40E-08	5.14E-07	8.517916186
RCC2	-0.618296954	9.830996453	-5.72492064	2.44E-08	5.21E-07	8.50248394
IL1RAP	-0.804714717	7.095611776	-5.724257964	2.45E-08	5.22E-07	8.499072833
PTPRE	0.645003856	6.612885173	5.721499796	2.48E-08	5.28E-07	8.484878653
CACNA2D3	-1.032759198	5.610210282	-5.72049849	2.50E-08	5.31E-07	8.479727064
RABGGTB	-0.781545241	7.296923773	-5.71887435	2.52E-08	5.35E-07	8.471372621
RNF10	-1.165280714	9.809374947	-5.704320019	2.72E-08	5.75E-07	8.39659194
TRAFD1	0.644668617	8.534125305	5.702536635	2.75E-08	5.80E-07	8.387439441
C4orf32	0.777805307	6.108062664	5.697344939	2.82E-08	5.94E-07	8.360808342
RAC2	-0.858552199	8.546243302	-5.697183893	2.83E-08	5.94E-07	8.359982563
R3HCC1	-0.658342032	4.741692865	-5.696217367	2.84E-08	5.96E-07	8.35502699
TEX10	-0.776222174	6.643179532	-5.695867028	2.85E-08	5.97E-07	8.353230904
EGOT	-0.620548129	3.199186614	-5.681594787	3.07E-08	6.41E-07	8.280137184
CISH	0.835421943	7.679326572	5.681130356	3.08E-08	6.41E-07	8.277761146
ZNF621	-0.687072306	5.944630547	-5.680932287	3.08E-08	6.41E-07	8.27674787
ZC3H15	-0.663032172	7.297985159	-5.677705088	3.13E-08	6.49E-07	8.260242275
KCP	-0.710776835	6.056878175	-5.669344041	3.28E-08	6.75E-07	8.217514832
N4BP1	-0.685030674	7.802595216	-5.668075574	3.30E-08	6.79E-07	8.211037045
PTP4A2	-0.611006433	9.931211642	-5.666781751	3.32E-08	6.83E-07	8.204430985
CLPP	-0.618438026	5.547710411	-5.664710366	3.36E-08	6.89E-07	8.193857359
CD1D	-0.763483097	7.287600073	-5.660609198	3.43E-08	7.03E-07	8.172931717
BPTF	-0.690677958	7.733990028	-5.658238197	3.47E-08	7.11E-07	8.160839623
SNRNP48	-0.625676738	6.865486876	-5.649164836	3.64E-08	7.43E-07	8.114603496
HMGN3	0.653930872	9.636628986	5.646834537	3.69E-08	7.50E-07	8.10273846
SERF2	-0.612335624	10.05402604	-5.645473625	3.72E-08	7.54E-07	8.095811028
LOC283508	0.880762476	6.912782708	5.634097779	3.95E-08	7.98E-07	8.03795779
PRDX5	-0.628314831	9.027105541	-5.628930244	4.05E-08	8.18E-07	8.011708996
PPP4C	-0.698229521	6.334724616	-5.614452796	4.37E-08	8.78E-07	7.938274325
MED12	-0.630138324	7.65778014	-5.608448227	4.51E-08	9.05E-07	7.907862224
CORO2A	0.629411181	5.305351518	5.608286533	4.52E-08	9.05E-07	7.907043639
LOC222159	0.711543163	4.9328474	5.601306507	4.69E-08	9.35E-07	7.87172516
FUS	-0.735202916	5.996731911	-5.593842689	4.87E-08	9.66E-07	7.833998391
CD74	-0.689559197	7.67662946	-5.583054638	5.16E-08	1.02E-06	7.779541385
PSTPIP1	-0.745861022	7.460228932	-5.582242757	5.18E-08	1.02E-06	7.775446558
EFR3A	0.607979883	7.796874575	5.578555104	5.28E-08	1.03E-06	7.756853536
AHCYL1	-0.649743216	6.025025043	-5.572480061	5.45E-08	1.06E-06	7.726245242
LOC100288442 /// LOC339047 /// NPIP	-0.601989976	9.355058702	-5.568415738	5.57E-08	1.09E-06	7.705782897
CCL5	-0.906432566	8.317878973	-5.565401779	5.65E-08	1.10E-06	7.69061662
FAM184B	0.714310158	6.221696662	5.561881647	5.76E-08	1.12E-06	7.672911766
CCDC90A	0.825920656	7.155838342	5.548693102	6.17E-08	1.19E-06	7.606660109
SIGLEC10 /// SIGLEC12	-1.007015163	6.106262712	-5.543853098	6.33E-08	1.22E-06	7.582378987
MBNL1	-0.897632291	5.5114979	-5.531435552	6.75E-08	1.30E-06	7.520162522
GIMAP2	0.63160129	8.898163865	5.514370988	7.37E-08	1.40E-06	7.434849275
MGC57346	0.745752757	3.539689374	5.509515968	7.56E-08	1.43E-06	7.410616396
ACOT9	0.633290298	8.926005822	5.507747145	7.63E-08	1.44E-06	7.401792019
CCDC43	-0.618160165	6.483098948	-5.504166972	7.77E-08	1.47E-06	7.383938212
ARID4A	-0.610384849	6.804941914	-5.497169591	8.06E-08	1.51E-06	7.349070795
RSBN1L	-0.597389683	8.86213642	-5.495837436	8.11E-08	1.52E-06	7.342436894
KIR2DL2	-0.782128326	3.276565868	-5.4949644	8.15E-08	1.52E-06	7.338090044
DPCD	-0.771433727	3.887951114	-5.479638469	8.82E-08	1.64E-06	7.261874557
TSPAN14	-0.74170777	7.458865034	-5.475491831	9.01E-08	1.67E-06	7.241283501
SP100	0.688644038	8.68054285	5.466177635	9.45E-08	1.74E-06	7.195078539
FLJ31306	-0.66493482	7.547654915	-5.45689743	9.91E-08	1.82E-06	7.149106589
ARHGAP17	-0.63609877	7.152260243	-5.455415919	9.99E-08	1.83E-06	7.14177349
RAPGEF2	-0.686627092	3.878973865	-5.450684708	1.02E-07	1.88E-06	7.11836618
CAMK2G	-0.778796336	4.539253163	-5.446985531	1.04E-07	1.90E-06	7.100076437
LOC100134445	-0.811542271	5.443545483	-5.433709051	1.12E-07	2.03E-06	7.034518189
LOC100286972	-0.737444781	5.681381232	-5.431137283	1.13E-07	2.05E-06	7.021834248
SACS	-0.733757893	6.659043228	-5.430123176	1.14E-07	2.06E-06	7.016834044
STARD4	-0.63927992	2.992071435	-5.429673884	1.14E-07	2.06E-06	7.01461899
ARL4C	-0.971136184	4.835064908	-5.42805164	1.15E-07	2.08E-06	7.006622421
LYZ	-1.599904147	9.281550582	-5.415727984	1.22E-07	2.20E-06	6.945939529
FAM100B	0.65609872	9.685510954	5.411123307	1.25E-07	2.25E-06	6.923294877
DTX3L	0.635675274	9.830492666	5.408396637	1.27E-07	2.28E-06	6.909893299
PI16	0.68636944	4.480346882	5.407230675	1.28E-07	2.29E-06	6.904164304
SCO2	1.228278037	8.769038195	5.398837393	1.33E-07	2.39E-06	6.862953729
CD247	-0.720220011	7.418350633	-5.398147752	1.34E-07	2.39E-06	6.859569982
COQ9	-0.735205051	4.819147042	-5.396881062	1.35E-07	2.41E-06	6.853355853
IL17RA	0.701540538	7.475984749	5.389470441	1.40E-07	2.49E-06	6.817025007
STYX	0.634880145	8.58734698	5.380295018	1.47E-07	2.60E-06	6.7720994
WDR59	-0.600779476	7.572990377	-5.366432947	1.57E-07	2.77E-06	6.704346819
ANKRD20A1 /// ANKRD20A2 /// ANKRD20A3 /// ANKRD20A4 /// ANKRD20A5 /// C21orf81 /// LOC100132733 /// LOC644339	-1.361773908	5.179664372	-5.36061208	1.62E-07	2.84E-06	6.675939798
COX16	0.620717925	5.275998706	5.356593452	1.65E-07	2.89E-06	6.65634299
CEP68	0.683376358	5.361194861	5.353375788	1.68E-07	2.93E-06	6.640660859
NISCH	0.599892371	8.199312108	5.348642234	1.72E-07	3.00E-06	6.617604861
LOC643733	-0.678936952	6.264159627	-5.346603213	1.74E-07	3.02E-06	6.607678493
ACTR2	-0.634188054	8.144611241	-5.346133472	1.74E-07	3.03E-06	6.605392143
ARHGDIA	-0.642032998	5.63664223	-5.333847724	1.86E-07	3.21E-06	6.545653522
KLRK1	-0.954799392	7.862422242	-5.330028951	1.89E-07	3.27E-06	6.527108255
SCP2	-0.619756884	7.767498153	-5.32630439	1.93E-07	3.33E-06	6.509031143
GLTSCR2	-0.781399785	12.2721077	-5.322379919	1.97E-07	3.38E-06	6.48999514
C5orf43	-0.619079833	5.464439734	-5.319878648	1.99E-07	3.42E-06	6.477868582
PGM2	-0.702728119	6.638426325	-5.319408199	2.00E-07	3.42E-06	6.475588299
KPTN	0.71722165	5.360317614	5.31713505	2.02E-07	3.46E-06	6.464572635
KIAA1598	0.709493584	7.725467058	5.296743311	2.24E-07	3.78E-06	6.36592965
GPS2	-0.614973143	7.13366377	-5.292208857	2.29E-07	3.86E-06	6.344037586
LOC142937	0.649095354	5.2710251	5.28951357	2.32E-07	3.91E-06	6.331032302
BEST1	0.837137762	5.971440474	5.285817548	2.36E-07	3.98E-06	6.313207259
RALY	-0.609128372	8.161930963	-5.285581336	2.36E-07	3.98E-06	6.312068417
RANBP9	0.585214812	6.931080204	5.284122961	2.38E-07	4.00E-06	6.305038137
PPIL4 /// ZC3H12D	0.935801635	8.458716057	5.281627981	2.41E-07	4.04E-06	6.293014527
C9orf71	0.752814818	5.477534654	5.272348341	2.53E-07	4.22E-06	6.248336366
TMEM106C	-0.665746514	4.797196201	-5.255838501	2.74E-07	4.56E-06	6.169009489
ANTXR2	0.672174597	5.07213021	5.250192317	2.82E-07	4.68E-06	6.141928243
MGC21881	0.683113735	6.162356971	5.248312825	2.85E-07	4.71E-06	6.132918885
RNF130	-0.747730176	5.634145409	-5.246144155	2.88E-07	4.76E-06	6.122526697
ZNF808	-0.769619741	5.336759465	-5.241137987	2.95E-07	4.86E-06	6.098551025
ZFYVE26	0.651758315	7.994403323	5.240542903	2.96E-07	4.87E-06	6.095702308
MEAF6	-0.595570566	6.759366994	-5.237461635	3.01E-07	4.94E-06	6.080956334
ABCG1	0.84544561	7.859940918	5.229119858	3.13E-07	5.14E-06	6.041071641
PHF20	-0.674966811	5.035854554	-5.223447612	3.22E-07	5.27E-06	6.013981207
PTPN22	-0.841146608	6.674272162	-5.212461604	3.40E-07	5.54E-06	5.961582474
CDCA7L	0.781059312	9.029753326	5.202620291	3.57E-07	5.79E-06	5.914721946
KCNK6	-0.612114153	6.084978724	-5.199589137	3.63E-07	5.87E-06	5.900303716
GOLGA8A	-0.684507608	8.336961123	-5.199471836	3.63E-07	5.87E-06	5.899745898
PTP4A3	-0.676888804	5.808657785	-5.198981121	3.64E-07	5.88E-06	5.897412429
RFC4	-0.702674135	6.920615843	-5.19312341	3.75E-07	6.05E-06	5.869571871
KLRG1	-0.922358229	5.21843524	-5.189075517	3.82E-07	6.16E-06	5.850348409
HIBADH	-0.679663553	5.072865882	-5.184113858	3.92E-07	6.30E-06	5.826802624
ZNF706	-0.667232564	7.916292211	-5.182988229	3.94E-07	6.33E-06	5.821463529
NNT	-0.671596998	4.477216318	-5.173109577	4.14E-07	6.60E-06	5.774648781
NUSAP1	0.891011083	5.760419814	5.167913177	4.24E-07	6.74E-06	5.750053248
OTUB1	-0.642914543	6.626715491	-5.16515672	4.30E-07	6.83E-06	5.737014854
C1GALT1	0.811248287	6.161187446	5.158665727	4.44E-07	7.04E-06	5.706334722
MATR3	-0.770205065	7.463958159	-5.151467019	4.60E-07	7.26E-06	5.672347466
LAMP3	1.867047329	5.31816956	5.142351294	4.81E-07	7.56E-06	5.629366696
EEA1	-0.609506191	6.761291334	-5.14092619	4.84E-07	7.60E-06	5.622653101
MT1G	0.71681462	6.793659057	5.138670283	4.90E-07	7.68E-06	5.612028841
C5orf56	0.649637471	7.143643973	5.136980763	4.94E-07	7.73E-06	5.604074565
FCGR3B	0.596123863	12.79635068	5.136442946	4.95E-07	7.75E-06	5.601542979
AATK	0.639515565	6.093278055	5.132030489	5.06E-07	7.87E-06	5.580781311
HEBP1	-0.95905107	7.323491853	-5.130660212	5.09E-07	7.92E-06	5.574336891
PARP9	0.854951825	10.11956838	5.123899463	5.27E-07	8.16E-06	5.542562263
CTSO	-0.807975684	6.441390546	-5.119946181	5.37E-07	8.29E-06	5.523998721
DYNC1I2	0.588292834	6.862684012	5.113130593	5.55E-07	8.55E-06	5.492022932
TOP1	-0.602184904	10.44144811	-5.112038637	5.58E-07	8.58E-06	5.486903285
RPL8	-0.609388993	11.66478702	-5.097739786	5.98E-07	9.13E-06	5.419948128
SMTNL1	0.590698017	6.720639749	5.096490591	6.02E-07	9.17E-06	5.414106226
PREPL	0.701599832	6.819538828	5.090752458	6.19E-07	9.40E-06	5.38728717
IRF7	1.351984356	7.798311382	5.090587968	6.20E-07	9.40E-06	5.386518752
MRPS9	-0.621020964	6.018141245	-5.063381109	7.07E-07	1.06E-05	5.259709636
CCDC65	-0.771924663	5.484374049	-5.062156128	7.11E-07	1.06E-05	5.254013615
KIR2DL1	-0.75678714	3.382173247	-5.060499411	7.17E-07	1.07E-05	5.246311926
SEPHS1	-0.70397856	6.340635936	-5.059635215	7.20E-07	1.07E-05	5.242295325
CLK3	-0.684621957	7.96765703	-5.052049271	7.47E-07	1.11E-05	5.20706241
SLAMF7	-1.026865699	4.919771637	-5.048973472	7.58E-07	1.13E-05	5.192789616
GUSBP3	-0.738745109	4.244686655	-5.047376843	7.64E-07	1.13E-05	5.185383594
SNHG8	-0.67680904	7.09141518	-5.040005326	7.92E-07	1.17E-05	5.151216286
PRKRA	-0.662330669	5.810026912	-5.028870765	8.35E-07	1.23E-05	5.099687363
ETNK1	0.779335794	4.248619078	5.027937801	8.39E-07	1.23E-05	5.095374146
KIAA1958	0.654707489	4.658011833	5.026674604	8.44E-07	1.24E-05	5.0895353
LYRM2	-0.615309241	4.704040991	-5.023198031	8.59E-07	1.26E-05	5.073472047
1-Sep	-0.670795067	7.391689134	-5.014326436	8.96E-07	1.31E-05	5.032524222
TRPM7	0.687416713	7.836416565	5.009365056	9.18E-07	1.34E-05	5.009651219
RCOR3	-0.650270687	7.252639327	-5.004538772	9.39E-07	1.37E-05	4.987419484
CBWD2	0.610169744	6.835292297	5.00014618	9.59E-07	1.39E-05	4.967201334
MAPKAPK3	-0.692278597	6.375415431	-4.990478829	1.00E-06	1.45E-05	4.922757747
CAT	-0.644457755	9.090188893	-4.981011939	1.05E-06	1.51E-05	4.879306625
RAP2C	0.604346347	6.939729709	4.980396078	1.05E-06	1.51E-05	4.876482381
C9orf72	0.597766552	4.350133638	4.974181535	1.09E-06	1.55E-05	4.84800004
EPB41L5	0.715513587	4.808458946	4.973447241	1.09E-06	1.56E-05	4.84463664
SDCCAG3	-0.720167852	4.078451933	-4.969436262	1.11E-06	1.59E-05	4.826272003
KIR2DS2 /// KIR2DS4	-0.96546041	3.583324256	-4.965189655	1.13E-06	1.62E-05	4.806842273
SPRY4	0.763926822	5.891267684	4.963576727	1.14E-06	1.63E-05	4.799466263
NAMPT	-0.750625566	9.858697445	-4.961962965	1.15E-06	1.64E-05	4.792088478
CDS2	-0.902017812	5.904824676	-4.954371551	1.19E-06	1.69E-05	4.757409553
AKIRIN1	-0.589928277	8.922733828	-4.951308177	1.21E-06	1.72E-05	4.74342833
KIAA0391	0.62645606	7.829865417	4.948645817	1.23E-06	1.73E-05	4.731283321
ZNF516	-0.722455184	8.044327333	-4.944107363	1.25E-06	1.77E-05	4.710592888
NBR2	0.602427645	7.772169315	4.940199514	1.28E-06	1.80E-05	4.692790303
YWHAE	-0.74143488	4.983250408	-4.933501939	1.32E-06	1.85E-05	4.662306786
STAG2	-0.586861257	6.924891151	-4.931718704	1.33E-06	1.86E-05	4.654196472
SDPR	-0.812956814	7.02946637	-4.930912194	1.33E-06	1.87E-05	4.650529213
TSPO	-0.62486082	8.175904959	-4.928988346	1.35E-06	1.89E-05	4.641783407
PREP	-0.708850395	5.376010185	-4.923911161	1.38E-06	1.93E-05	4.618716532
XCL1 /// XCL2	-1.053619957	6.834452927	-4.923852743	1.38E-06	1.93E-05	4.618451242
ELL3 /// SERINC4	0.613697873	5.68778331	4.911713289	1.46E-06	2.03E-05	4.563381658
RRP12	-0.586175949	3.562552878	-4.905061438	1.51E-06	2.08E-05	4.533255382
TMEM60	0.622925262	7.332226055	4.898454577	1.56E-06	2.14E-05	4.503367426
XRCC4	-0.602486492	5.895312366	-4.895360412	1.58E-06	2.17E-05	4.489381963
MMAA	-0.639213672	4.518128393	-4.887221278	1.64E-06	2.24E-05	4.452629614
ACTR3B /// LOC100290215	-0.622106638	3.868053112	-4.882269147	1.68E-06	2.29E-05	4.430293826
PARP12	0.91097185	10.20664039	4.879919372	1.70E-06	2.31E-05	4.419702328
NFIX	-0.97361678	9.099000015	-4.874701699	1.74E-06	2.36E-05	4.396199533
ZNF600	-0.95255902	7.849688542	-4.872278826	1.76E-06	2.38E-05	4.385293123
NFIL3	0.633065446	9.487624008	4.865955434	1.81E-06	2.45E-05	4.35685066
POC1B	0.615314941	5.551460237	4.861065096	1.86E-06	2.50E-05	4.334875749
HCG26	0.673460371	7.636072219	4.846479764	1.99E-06	2.66E-05	4.269448592
CG012	0.634995244	7.246884567	4.835688808	2.09E-06	2.78E-05	4.221150919
ALPL	-0.606282805	3.110788424	-4.831638879	2.13E-06	2.83E-05	4.203048291
MCTP1	0.755082325	6.569036194	4.831423435	2.13E-06	2.83E-05	4.202085651
C1orf63	-0.796154014	7.335485185	-4.830451152	2.14E-06	2.84E-05	4.197741782
IP6K1	0.599938307	6.344296133	4.827539639	2.17E-06	2.87E-05	4.184738514
PRR14	-0.77095526	4.603003876	-4.826270743	2.18E-06	2.89E-05	4.179073539
ZFP91	-0.618034583	5.532723983	-4.82237923	2.22E-06	2.93E-05	4.161707881
VPS28	-0.637037411	9.575099227	-4.808168446	2.38E-06	3.12E-05	4.098395368
SH2D1A	-0.914278508	6.807300816	-4.806594168	2.39E-06	3.14E-05	4.091391463
DLEU2 /// DLEU2L	0.651882795	3.703013441	4.802491746	2.44E-06	3.19E-05	4.073149211
RHBDF2	0.734013584	6.855342485	4.798273	2.49E-06	3.25E-05	4.05440368
AP2M1	-0.649031447	7.476097101	-4.791983683	2.56E-06	3.33E-05	4.026484131
RHOH	-0.727940918	6.144113396	-4.787575161	2.62E-06	3.39E-05	4.006932613
CIB1	-0.693119395	6.837126795	-4.78299694	2.67E-06	3.46E-05	3.986644896
GRAP2	-0.622620004	6.753161012	-4.764709978	2.91E-06	3.73E-05	3.905775793
AKAP11	-0.827005868	4.924066659	-4.761767169	2.95E-06	3.77E-05	3.892786979
GSTP1	-0.69449362	9.161037792	-4.756783196	3.02E-06	3.85E-05	3.870804778
CBX3	-0.729309032	5.188352825	-4.74795369	3.14E-06	4.00E-05	3.831910339
CPEB4	-1.096805542	5.826284067	-4.743637166	3.20E-06	4.08E-05	3.812918532
CD99	-0.650352172	8.167473621	-4.735403831	3.33E-06	4.22E-05	3.776734948
KAT2B	-0.663079208	7.821386089	-4.725758987	3.48E-06	4.39E-05	3.734417213
CREB5	0.729894493	9.43315035	4.710016141	3.74E-06	4.68E-05	3.665504201
IFI44L	2.642421875	8.914624966	4.69875968	3.94E-06	4.90E-05	3.61635201
RNF187	0.608411783	9.083838047	4.697058155	3.97E-06	4.93E-05	3.608931037
ZFYVE16	0.741594546	6.478403787	4.692759121	4.05E-06	5.01E-05	3.590191742
TTC32	-0.642601791	6.094918358	-4.691931392	4.06E-06	5.03E-05	3.586585415
CLEC4E	0.948843677	6.289335875	4.689543591	4.11E-06	5.08E-05	3.576185114
ADAMTSL4	0.872148582	6.410621624	4.684926779	4.19E-06	5.17E-05	3.556089144
TPCN2	0.661579486	5.738897749	4.654156755	4.82E-06	5.88E-05	3.422592641
SH3BP5L	0.615578295	8.694159353	4.654056718	4.83E-06	5.88E-05	3.422159873
GBP4	0.932482181	8.018202754	4.652777211	4.85E-06	5.91E-05	3.416625344
LSM12	-0.607443996	4.664040821	-4.64899151	4.94E-06	6.00E-05	3.400257968
CCDC91	0.780146959	4.544098185	4.635558181	5.25E-06	6.34E-05	3.342272761
RAD23A	-0.947048213	7.730130669	-4.63343794	5.30E-06	6.39E-05	3.333134033
GPR160	0.79813374	6.816357033	4.626526712	5.47E-06	6.57E-05	3.303370284
IFIT5	1.316612602	7.422007594	4.620073507	5.63E-06	6.75E-05	3.275613948
UBXN11	-0.680017004	7.298281392	-4.616831216	5.71E-06	6.84E-05	3.261681028
C14orf138	0.587953152	8.367940104	4.609446188	5.90E-06	7.04E-05	3.229977536
REM2	0.689423088	7.933582205	4.608088688	5.94E-06	7.06E-05	3.224154673
PJA2	-0.771788019	6.453929183	-4.607678444	5.95E-06	7.07E-05	3.222395267
IMPDH2	-0.642160345	7.618580694	-4.599844047	6.16E-06	7.30E-05	3.188822209
DPM2	-0.608857948	4.973853812	-4.596632026	6.25E-06	7.39E-05	3.175071995
NTNG2	0.772572597	9.623697591	4.589406625	6.46E-06	7.60E-05	3.144171663
SIGLEC1	2.63732468	7.408196627	4.569924596	7.05E-06	8.23E-05	3.061065629
LOC727820	-0.616674246	8.029833021	-4.56696966	7.14E-06	8.33E-05	3.048487471
CT45A1 /// CT45A2 /// CT45A3 /// CT45A4 /// CT45A5 /// CT45A6 /// LOC100133581	1.1880592	3.688953694	4.561316286	7.32E-06	8.51E-05	3.024442781
SMG7	-0.607290346	7.426873318	-4.561231359	7.33E-06	8.51E-05	3.02408177
ZNF117	-1.004662438	5.664282579	-4.557381077	7.45E-06	8.64E-05	3.007721072
PGS1	0.646409612	7.23019196	4.551979101	7.64E-06	8.80E-05	2.98478723
ZBED6	0.674146783	4.4684816	4.551973316	7.64E-06	8.80E-05	2.984762684
SLC24A1	0.644084768	6.283391642	4.549328417	7.73E-06	8.88E-05	2.973542568
ZCCHC2	1.09626512	8.290542816	4.545860831	7.85E-06	9.00E-05	2.958841106
ZNF281	-0.617596958	7.967142448	-4.543061223	7.95E-06	9.10E-05	2.946978809
BSG	-0.78065184	7.046265344	-4.541410582	8.00E-06	9.16E-05	2.939987826
LOC100288332 /// LOC100288583 /// NPIPL3	0.701149823	7.686902668	4.539721656	8.06E-06	9.22E-05	2.932836993
AFG3L2	0.603721998	6.829582516	4.523507743	8.67E-06	9.82E-05	2.864306456
ASPHD2	0.641654787	5.306357866	4.519071826	8.84E-06	0.000100011	2.845594779
LOC148696	0.715685732	3.324528694	4.509214622	9.23E-06	0.000104074	2.804072466
MGMT	-0.594171095	5.439798448	-4.496709269	9.76E-06	0.000109509	2.751509477
RNF141	-0.692604173	4.209429485	-4.493089237	9.91E-06	0.000111152	2.736317499
ZRANB1	0.609167611	5.925188774	4.491499336	9.98E-06	0.000111815	2.729648646
DDA1	-0.593609081	5.013403325	-4.491496164	9.98E-06	0.000111815	2.729635343
6-Sep	-0.602936913	8.281526745	-4.491146594	1.00E-05	0.000111927	2.728169345
LOC100288282	-0.63026241	3.818984784	-4.481976468	1.04E-05	0.000116289	2.68974823
FIS1	-0.612689499	8.656368557	-4.475402672	1.07E-05	0.000119528	2.662247658
CD52	-0.636966059	11.20955958	-4.464523805	1.12E-05	0.000124686	2.616815271
TMEM123	0.68781033	8.69495214	4.45618958	1.17E-05	0.000128639	2.582075538
EEF1E1	-0.6130248	5.715312504	-4.453265879	1.18E-05	0.000130089	2.56990213
C15orf54	-0.658825558	3.405168765	-4.449291737	1.20E-05	0.000131882	2.553366257
MYO6	-0.656090798	4.012674067	-4.444961516	1.22E-05	0.00013412	2.535363568
VIPR1	0.60099893	6.764105582	4.442024092	1.24E-05	0.000135638	2.523160143
SLC2A14 /// SLC2A3	-0.630269792	8.61798426	-4.436197231	1.27E-05	0.000138632	2.498973649
TFDP2	0.593943317	7.288606309	4.427552644	1.32E-05	0.000143573	2.463142636
TARBP1	-0.588925453	7.402117181	-4.42244779	1.35E-05	0.000146571	2.442012379
USP10	-0.726569595	3.69321804	-4.419082075	1.37E-05	0.000148424	2.428092589
DBN1	0.650809259	5.51425441	4.396633137	1.51E-05	0.000162415	2.335488061
NRIP1	-0.708544141	5.693268071	-4.371591261	1.68E-05	0.000178427	2.232678268
RSAD2	2.188145577	9.926779874	4.368536105	1.71E-05	0.000180702	2.220170765
NCRNA00173	0.623128863	7.951939133	4.342432376	1.91E-05	0.00019833	2.113619825
FCHSD2	0.597645467	8.8373171	4.335835128	1.96E-05	0.000203106	2.086780396
HERC5	1.683387683	8.727204118	4.335260258	1.97E-05	0.000203405	2.084443376
TFEC	0.612603256	7.8717764	4.332488267	1.99E-05	0.00020563	2.073178246
NCF4	-0.633605176	10.69502147	-4.328878851	2.02E-05	0.000208522	2.058519455
TREML4	1.221700204	7.907200533	4.328644591	2.03E-05	0.000208627	2.057568435
OASL	1.507713266	8.964519695	4.32657431	2.04E-05	0.000210171	2.049165761
LOC388210	0.756089603	7.409103438	4.325071704	2.06E-05	0.000211212	2.043069341
ZNF814	-0.699872055	7.255987971	-4.320187369	2.10E-05	0.000214819	2.023265431
ASF1A	-0.626919203	6.614823529	-4.315589247	2.14E-05	0.000218649	2.004640105
RPL31	-0.727742887	4.30007147	-4.313773496	2.16E-05	0.000220243	1.997289996
MGC39372	0.64108058	4.985422063	4.313165019	2.16E-05	0.000220707	1.994827511
TRA@ /// TRAC /// TRAJ17 /// TRAV20	-0.682612018	10.87630781	-4.306339612	2.23E-05	0.000226226	1.967226418
CHST11	-0.599964771	5.967524571	-4.297352385	2.32E-05	0.000234498	1.930942305
LOC284749	-0.692849245	4.164608719	-4.294434578	2.34E-05	0.000236831	1.919176701
SERPING1	1.520480973	6.185778731	4.290808654	2.38E-05	0.000239577	1.904565608
SLC25A6	-0.704675644	9.34489388	-4.284828942	2.44E-05	0.000244436	1.880493562
LSM5	0.612354023	3.942915782	4.282920045	2.46E-05	0.000246069	1.872815338
LOC153682	0.721693021	6.776651969	4.281688249	2.47E-05	0.000247239	1.867862255
ZNF167	0.60096447	5.202905032	4.266157264	2.64E-05	0.000261288	1.805520312
IFNG	-0.587256336	3.37302758	-4.264336357	2.66E-05	0.000263058	1.798224306
POMZP3 /// ZP3	-0.65350796	5.531594611	-4.263187655	2.68E-05	0.000264087	1.79362311
HDDC2	-0.625338444	7.224014809	-4.261214071	2.70E-05	0.000266173	1.785720371
CDC14B	0.663142197	8.131141281	4.259488347	2.72E-05	0.00026774	1.778812797
VAMP8	-0.59568658	9.962496002	-4.256475786	2.75E-05	0.000270783	1.766760339
USP18	2.030293559	5.333095553	4.250434928	2.82E-05	0.000276727	1.742615313
ARMC1	0.714866411	5.013508692	4.2431715	2.91E-05	0.000284525	1.713624102
NEDD4L	1.067365672	6.615221003	4.229620577	3.08E-05	0.000299104	1.659654949
DISC1 /// TSNAX /// TSNAX-DISC1	0.608767376	5.066704897	4.226134768	3.13E-05	0.000302524	1.645796894
ITGB1	-0.690404819	5.672025461	-4.224182601	3.15E-05	0.000304589	1.638040374
ASCC2	-0.814949912	8.457946046	-4.22315351	3.17E-05	0.000305481	1.633952783
NRGN	0.612565881	9.113537374	4.208646824	3.37E-05	0.000321312	1.576426057
LOC729839	0.658038758	3.541819465	4.208560138	3.37E-05	0.000321312	1.576082831
GALNT12	-0.619151165	4.685933828	-4.195321769	3.56E-05	0.000337112	1.523740591
IFI44	2.00354289	8.855871683	4.178079372	3.82E-05	0.000359601	1.455787692
C16orf72	-0.711942704	6.228750195	-4.177089702	3.84E-05	0.000360594	1.451894947
EIF2AK2	0.808538325	9.343825301	4.169586256	3.96E-05	0.000370176	1.422407857
VNN3	-0.667949758	4.129548315	-4.168417106	3.98E-05	0.00037181	1.417817584
ARFIP1	-0.797625129	5.500902452	-4.160600927	4.11E-05	0.000383206	1.387159557
RASGEF1A	0.658826817	6.192485418	4.154203748	4.22E-05	0.000392443	1.362105649
TRA@ /// TRAC	-0.614859422	10.3637971	-4.137257106	4.53E-05	0.000418678	1.295902447
HSP90AB1	-0.611988001	8.476036924	-4.118239847	4.90E-05	0.000447816	1.221898615
FLJ42418	1.81783279	4.217705363	4.104663505	5.18E-05	0.000470181	1.169254412
KIAA0182	-0.590883431	5.861178132	-4.102934662	5.22E-05	0.0004727	1.162561755
PNPT1	-1.034523648	4.78823381	-4.093526889	5.42E-05	0.000489776	1.12618692
TREML1	-0.910942007	6.031144861	-4.087801902	5.55E-05	0.00049964	1.1040881
DDX60	1.374990007	8.778563412	4.084322342	5.63E-05	0.000505699	1.09067033
WHAMML1 /// WHAMML2	0.672533665	5.521593087	4.074892338	5.85E-05	0.000524181	1.054358193
PLEK	-0.732160576	7.517632874	-4.06603985	6.07E-05	0.000539935	1.020338471
TRA@ /// TRD@	-0.973426468	8.151965084	-4.05513326	6.34E-05	0.000559995	0.978516305
SLC22A4	0.676861863	8.404029423	4.053649037	6.38E-05	0.000562522	0.972832736
KLRF1	-1.159055073	7.585554393	-4.052618404	6.41E-05	0.000564641	0.968887213
OAS3	1.790654325	8.630172501	4.035663558	6.86E-05	0.000599964	0.904109239
ALS2CR12	-0.913033841	6.866894018	-4.035115045	6.88E-05	0.00060079	0.902017661
WNK1	0.670077046	3.352769715	4.028587315	7.06E-05	0.000612216	0.877145875
LOC645984	0.917563333	5.348893945	3.995500585	8.07E-05	0.000686282	0.751637424
LGALS3BP	0.911454589	5.51127718	3.983563715	8.46E-05	0.000715521	0.706586089
DDX60L	0.79494287	5.754646372	3.960611841	9.27E-05	0.000776006	0.620304443
LTBP1	0.632132776	5.576408377	3.952244886	9.59E-05	0.000797792	0.588963005
LOC649305	0.625875534	7.578339403	3.950588289	9.65E-05	0.000802424	0.582764725
ST13	-0.599146505	9.3471576	-3.944758905	9.88E-05	0.000819265	0.560972332
EPB41	-0.821378211	9.022661206	-3.941231663	0.000100183	0.000828144	0.547800319
BATF2	1.221989903	5.952393544	3.935523038	0.000102478	0.000844331	0.526504792
LPAR2	-0.60811774	6.375333337	-3.934558794	0.00010287	0.000846678	0.522910521
NR2C1	-0.664365179	5.771665268	-3.927477248	0.000105797	0.0008687	0.496538076
EPSTI1	1.624939866	8.540632724	3.918618331	0.00010957	0.00089613	0.463607025
CMPK2	1.646113116	8.539880856	3.894756087	0.000120377	0.000974144	0.375239391
HAGH	-0.70283071	8.826695987	-3.880663774	0.000127225	0.001021783	0.323281876
IFI27	2.632089919	8.387615675	3.878813058	0.000128152	0.001027839	0.316471081
FGFBP2	-1.04163511	8.000166306	-3.849419743	0.000143748	0.001137101	0.208696398
HGD	-0.733605821	6.046998324	-3.848413548	0.000144313	0.001140696	0.205020221
KLRD1	-0.9167042	7.154132766	-3.847379217	0.000144895	0.001143796	0.201242154
ETV7	0.604884171	4.536362115	3.790860172	0.000180327	0.001388846	-0.003798802
ZBP1	0.855387482	6.985266582	3.780775991	0.000187453	0.001437857	-0.040091981
TP53TG3 /// TP53TG3B	0.643541301	4.163686676	3.7745994	0.000191948	0.001466373	-0.06227816
GPR183	-0.707801506	7.70097435	-3.773873107	0.000192484	0.001469921	-0.064884813
GALM	0.626933192	7.624168661	3.768696076	0.00019634	0.001497164	-0.083451862
MX1	1.376738846	9.813804399	3.766653828	0.000197881	0.001507254	-0.090769844
CD93	-0.632719235	7.265224124	-3.764319748	0.000199656	0.001517989	-0.099129114
GZMA	-0.740279185	9.12473645	-3.760006224	0.000202977	0.001539849	-0.114565131
IFIT1	1.77493037	9.200457719	3.758186618	0.000204393	0.001549461	-0.121071778
LOC284751	-0.690181482	4.410401506	-3.747373103	0.000213005	0.001607106	-0.159680054
PRRC1	-0.633004869	5.107225672	-3.745065576	0.000214886	0.00161777	-0.167905638
IL15	-0.705550367	5.707430314	-3.731284766	0.000226453	0.001693171	-0.216933436
FAM153B	0.723461445	5.652674921	3.726454645	0.000230644	0.001718699	-0.234078417
DHX58	0.644650469	5.585687719	3.715871781	0.000240084	0.001780965	-0.271572366
LY6E	1.382974529	6.946595865	3.706571785	0.000248679	0.001832925	-0.304440771
LOC439911	0.636589744	7.295409411	3.693201082	0.000261546	0.001920251	-0.351563995
SLC26A8	1.038798217	5.974184502	3.686398266	0.000268331	0.00196312	-0.375479778
CNTNAP3B	0.772565923	3.225294592	3.683054619	0.000271726	0.001983761	-0.38721981
CCR7	-0.605113105	7.191195377	-3.673790075	0.000281346	0.002046071	-0.419698006
MXD1	-0.712539393	6.277905564	-3.664210175	0.00029163	0.002106093	-0.453202922
SRXN1	0.59992102	7.920885614	3.662466165	0.00029354	0.00211841	-0.459293827
SMG1	-0.687171783	5.010210993	-3.660924628	0.000295238	0.002127702	-0.464675389
RBP7	-0.598131381	9.794083925	-3.65747223	0.000299074	0.002151611	-0.476720303
CASP5	0.796028883	6.862084554	3.640737591	0.000318344	0.002270551	-0.534957334
OR52K3P	0.903733499	7.055632776	3.6358199	0.000324224	0.002306943	-0.552024466
PAPD5	-0.618530734	6.793397646	-3.632724497	0.000327978	0.002328062	-0.562756384
LQK1	0.795259156	5.591195053	3.616199115	0.000348721	0.002454297	-0.619908713
NOV	-0.617353388	5.044090351	-3.610868412	0.00035567	0.002498969	-0.638293668
FAM125A	0.754604786	7.326594311	3.608569804	0.000358707	0.002511797	-0.646213601
LGALS9	0.612600569	8.015710258	3.607093709	0.00036067	0.002520437	-0.651297096
KIF13A	-0.710687824	6.277910853	-3.6018529	0.000367721	0.002560223	-0.66933037
IL1R1	-0.868832277	6.330269187	-3.600226727	0.000369935	0.00257374	-0.674921024
UBE2H	-0.686223252	6.95352129	-3.600153744	0.000370035	0.00257374	-0.675171879
IGHD	-0.645451149	2.897274641	-3.599631338	0.000370749	0.002577843	-0.676967344
PLSCR1	0.856347014	7.622984203	3.588613423	0.000386115	0.00266947	-0.714779161
C5orf4	-0.78907623	8.050921354	-3.574604492	0.000406517	0.002792832	-0.762701714
SMA4 /// SMA5	-0.812235358	9.399895493	-3.569798322	0.000413746	0.002834988	-0.779103193
MTERFD1	-0.61161073	5.995796289	-3.564194959	0.000422327	0.002889012	-0.798199516
LOC284757	0.882126476	6.166005098	3.557884871	0.00043219	0.002946762	-0.819671294
KLRB1	-0.644497928	9.555934235	-3.530359907	0.000477794	0.003216463	-0.912922373
DHRS9	0.672730424	7.401548936	3.516580188	0.000502283	0.003361682	-0.959355437
ISG15	1.608928644	9.233696635	3.513222483	0.000508426	0.0034006	-0.970644396
HLA-DPB1	-0.642547988	11.02803286	-3.475694938	0.000582043	0.003817883	-1.096138154
GUK1	-0.592887483	10.63952246	-3.471349616	0.000591183	0.00387294	-1.110588643
CCR3	-0.674614164	8.025555835	-3.464310212	0.000606276	0.003958065	-1.133962893
ZSWIM7	-0.645604331	8.039432919	-3.450958799	0.000635897	0.004133233	-1.178175506
RASGRP3	0.593259509	6.449329411	3.43929629	0.000662873	0.004288411	-1.216666075
NKG7	-0.661119445	9.007041988	-3.43650647	0.000669482	0.004321735	-1.225855627
ARL4A	0.699235272	6.278638836	3.433832574	0.000675875	0.004354869	-1.234656846
CYBRD1	-0.819333121	5.544734635	-3.413968651	0.00072518	0.004629413	-1.299840871
FCGR1B	0.63155108	9.015425488	3.41092659	0.000733021	0.004665851	-1.309792527
SRGAP2	-0.67791175	3.577827652	-3.382829387	0.000809275	0.005091047	-1.401319347
BANK1	-0.725135783	5.564710279	-3.380831575	0.00081497	0.005120657	-1.407800477
FKBP5	0.794388138	5.994258105	3.303572952	0.001066089	0.006439063	-1.655704992
SAMD9L	0.770153835	9.245703402	3.2994946	0.001081163	0.006516523	-1.668643223
MYBL1	-0.671440554	8.753842709	-3.286977003	0.001128675	0.006763657	-1.708261243
IL7R	-0.605574706	8.029368333	-3.28436142	0.001138844	0.006811065	-1.716521798
TBX21	-0.621666163	7.263734213	-3.261891446	0.001229783	0.007254528	-1.787233959
NCAPG2	0.596282217	5.438669726	3.254856	0.001259613	0.007403124	-1.809281125
PROS1	-0.820115599	6.287837634	-3.250597258	0.001277994	0.007485704	-1.822605266
IL18RAP	0.681029323	9.569119619	3.237028518	0.001338232	0.007798897	-1.864948554
SLC7A5	0.632478326	6.441099679	3.233408965	0.00135474	0.007875186	-1.876215958
PIP4K2A	-0.63860679	8.433014171	-3.208556353	0.001473284	0.008457619	-1.953262086
MS4A1	-1.009607652	7.977791942	-3.203717702	0.001497452	0.00857974	-1.968197839
MT2A	0.716375757	8.887234065	3.198254642	0.001525181	0.008702551	-1.985035648
IGF2R	-0.610325807	8.355031783	-3.196512893	0.001534121	0.008748748	-1.990398276
NMNAT3	0.603666389	5.584658145	3.194912916	0.001542375	0.008783748	-1.995321996
NAPSB	-0.757473972	5.968778465	-3.18908521	0.001572792	0.008929995	-2.01323649
TRIM6	0.986256903	4.235020367	3.182417544	0.001608272	0.00911239	-2.033695486
BCL2L1	-0.683210314	5.524881186	-3.178474478	0.001629601	0.009207178	-2.045775482
SAMD4A	0.769055952	4.704517037	3.169126666	0.001681215	0.009460139	-2.074357437
DKFZp667F0711	0.645753085	4.228860224	3.15998952	0.001733122	0.009712694	-2.10221903
PRRG4	0.60276861	6.516233379	3.13241489	0.001898883	0.010508197	-2.185844129
PTP4A1	-0.607794965	4.796615137	-3.130231423	0.001912614	0.010575722	-2.192436519
CD160	-0.639952776	6.173218028	-3.048545899	0.002497156	0.013287203	-2.435959669
TIMM10	0.736241455	7.978531964	3.041502165	0.002554574	0.013553276	-2.456674948
AKR1C3	-0.642048922	6.132630168	-3.04101687	0.002558574	0.013565282	-2.458100516
IFI35	0.718266074	8.334183745	3.03915593	0.002573967	0.013632954	-2.463565093
TRIM14	-0.605857286	5.745236686	-3.027538692	0.002672	0.014119733	-2.497607421
THBD	-0.631863923	7.888752563	-3.012319212	0.00280562	0.014731989	-2.54201959
ASPRV1	0.599595111	6.843637188	3.008982632	0.002835721	0.014856197	-2.55172791
GOLGA6L4 /// PML	0.701772441	6.996462833	3.007266534	0.002851318	0.014926598	-2.556717226
ENDOD1	0.606847921	5.826872711	2.98768867	0.00303491	0.015748577	-2.613447083
STRAP	-0.588265177	4.920258462	-2.978818763	0.003121602	0.016113735	-2.639033903
ANK1	0.788238359	6.916370925	2.966528527	0.003245475	0.016649614	-2.67436856
TCP11L2	-0.723009491	4.77622078	-2.911089362	0.003862122	0.019334846	-2.832040699
CDA	-0.587963349	8.387921649	-2.908467167	0.003893779	0.019469835	-2.839428678
NFXL1	-0.851234449	5.903157183	-2.901638813	0.003977332	0.019843337	-2.858637851
PRSS33	-1.01143234	7.871416628	-2.872170137	0.004357002	0.021373835	-2.941047027
SLC14A1	0.603685515	7.434655214	2.84983062	0.004666507	0.022698878	-3.002988111
KIAA1466	0.619668839	7.808236399	2.815486773	0.005181479	0.024677167	-3.097318525
RBPMS2	0.932948806	5.725254374	2.797396634	0.005473004	0.025834222	-3.146568945
MPL	0.643772164	5.818751036	2.756553437	0.006186633	0.02864218	-3.256654292
IFIT2	0.817480508	8.212691609	2.628954895	0.008990603	0.0391013	-3.59062578
IFIT3	1.005429841	8.987709401	2.619430706	0.009239854	0.039903186	-3.614947737
HEY1	0.586056307	5.738933521	2.598012275	0.009823152	0.041965397	-3.669335557
RRM2	0.642308958	4.71937055	2.562650458	0.010858598	0.045609188	-3.758194129
