# Supplementary material for: Identification of NETs-related biomarkers and molecular clusters in systemic lupus erythematosus
Source: Front Immunol. 2023 Apr 18;14:1150828. doi: 10.3389/fimmu.2023.1150828 (PMC10151561; doi:10.3389/fimmu.2023.1150828)
Supplement: Supplementary file 3 [file Table_3.xls]

id	logFC	AveExpr	t	P.Value	adj.P.Val	B
CA4	0.587795894	5.771313226	8.259255695	5.22E-15	1.21E-12	23.45090371
TNFRSF10C	0.588419117	9.023749226	8.246614638	5.69E-15	1.29E-12	23.36688427
CREB5	0.589207124	9.490129736	7.560292235	5.29E-13	6.53E-11	18.92902999
SULT1B1	0.589706859	6.127664627	7.51235277	7.19E-13	8.57E-11	18.62850391
TREM1	0.592493587	10.07605687	7.585605309	4.50E-13	5.76E-11	19.08822981
ZYX	0.593251625	8.851337408	8.695199644	2.59E-16	9.77E-14	26.39580005
GDPD3	0.59823097	7.695793743	8.347406541	2.87E-15	7.16E-13	24.03899808
C20orf3	0.59944402	10.15143693	8.383725143	2.24E-15	5.87E-13	24.28240425
LTBP2	0.600291665	5.566944247	5.989212444	6.21E-09	2.20E-07	9.799971177
TSPAN16	0.601066383	9.475361582	4.809473304	2.43E-06	3.98E-05	4.044952715
ANKRD22	0.602077475	6.089692565	4.276550191	2.58E-05	0.000309383	1.795550273
TLE3	0.605055121	5.331004342	8.740954706	1.88E-16	7.80E-14	26.71007382
LOC100128737	0.605372517	5.656460089	6.681144034	1.21E-10	7.05E-09	13.63037383
DENND3	0.605677391	5.332831805	6.95433126	2.34E-11	1.73E-09	15.22740103
KIAA1324	0.607025607	7.27103349	4.301494977	2.32E-05	0.000281642	1.895700772
DEFA4	0.6087465	6.605196308	2.558899568	0.011006801	0.04785997	-3.809622026
TKT	0.610052026	9.962435086	10.07015881	1.17E-20	4.05E-17	36.2253764
FKBP9	0.610192815	6.058812476	5.809094093	1.65E-08	5.17E-07	8.855882527
TBC1D1	0.613749451	5.674874976	8.220381375	6.79E-15	1.42E-12	23.1927773
S100A12	0.613976095	11.30924388	8.020018788	2.61E-14	4.83E-12	21.87444518
HSPA1A /// HSPA1B	0.614417154	9.278444503	9.518071573	7.12E-19	9.68E-16	32.18736064
IRAK3	0.616726709	7.275331716	5.362864116	1.67E-07	3.87E-06	6.616442583
HP /// HPR	0.620311342	6.33126751	5.152021376	4.76E-07	9.63E-06	5.609203019
PAQR6	0.621844621	4.920936267	7.035824542	1.42E-11	1.14E-09	15.71265941
PYGL	0.624567794	10.82684066	9.384969606	1.88E-18	1.85E-15	31.23131266
NCF1 /// NCF1B /// NCF1C	0.625364513	10.53456427	9.324462082	2.92E-18	2.43E-15	30.79905557
ENTPD1	0.629591165	6.542840339	7.786468976	1.22E-13	1.82E-11	20.36396263
TMEM176B	0.630921782	6.99358214	2.956173885	0.003370037	0.018684292	-2.746887115
LPAR2	0.633897496	6.331905127	8.810035364	1.16E-16	5.22E-14	27.18636947
LCN2	0.635544916	7.906411058	3.841996554	0.000149871	0.00138709	0.13416997
TMEM88	0.636334699	6.085831911	8.315478693	3.56E-15	8.69E-13	23.82555109
LRG1	0.637537309	7.391753719	8.016364121	2.67E-14	4.91E-12	21.8505889
MAST3	0.637685523	7.974152363	9.062190963	1.93E-17	1.15E-14	28.94297641
PI3	0.640414905	10.63607047	5.060295757	7.43E-07	1.42E-05	5.18148542
SIRPB1	0.64182876	8.136433616	7.290105613	2.94E-12	2.95E-10	17.25221475
ARAP3	0.642632642	8.126173099	9.489788784	8.76E-19	1.01E-15	31.98362011
HECW2	0.64341829	5.783060644	5.706211467	2.84E-08	8.36E-07	8.326848464
PREX1	0.643921205	7.875739298	10.04038764	1.47E-20	4.35E-17	36.00477907
LOC100289727 /// NCF1 /// NCF1B /// NCF1C	0.644004313	10.05877665	9.273925422	4.22E-18	3.37E-15	30.4391764
RAB27A	0.644136642	7.675869342	8.592427742	5.30E-16	1.77E-13	25.69342295
STX10	0.644774431	7.757774818	9.154299922	1.00E-17	6.69E-15	29.59152975
ANPEP	0.646142057	8.894554315	8.709118465	2.35E-16	9.22E-14	26.49130146
FLJ45340	0.64790345	9.069203623	8.442821547	1.49E-15	4.23E-13	24.67983456
GRB10	0.651913674	6.559969014	5.007035953	9.60E-07	1.77E-05	4.936085194
FLJ10357	0.653610814	7.046045894	6.710735723	1.01E-10	6.05E-09	13.80112199
RBP7	0.668582382	9.758377774	8.024080181	2.54E-14	4.79E-12	21.9009645
DGAT2	0.675690405	8.763110839	9.373285528	2.05E-18	1.85E-15	31.14772739
MME	0.681339133	8.70893138	6.705987337	1.04E-10	6.20E-09	13.77368603
GLT1D1	0.685358171	9.359038873	11.36381495	5.23E-25	5.43E-21	46.08571413
TPST1	0.688309698	5.425931394	5.517108876	7.63E-08	1.98E-06	7.374211103
IRS2	0.688365127	9.556857949	6.684810942	1.18E-10	6.95E-09	13.65150247
LIN7A	0.692920137	7.313722092	8.921092444	5.28E-17	2.74E-14	27.95657953
TIMP2	0.692922745	7.363151887	8.855261926	8.42E-17	4.06E-14	27.49936304
NADK	0.693188638	6.083754846	7.881068834	6.55E-14	1.07E-11	20.97232402
EMR3	0.695331867	8.611706695	7.668968937	2.62E-13	3.56E-11	19.61502184
ROPN1L	0.697772312	6.485864401	8.258097833	5.26E-15	1.21E-12	23.44320461
G6PD	0.698310625	5.758875216	9.133160238	1.16E-17	7.40E-15	29.44236256
IMPA2	0.699941863	7.74654889	8.885106227	6.82E-17	3.45E-14	27.70640376
LOC100128590	0.705602672	6.43711986	4.873259639	1.81E-06	3.07E-05	4.329349551
PGLYRP1	0.706972084	6.253389925	8.235386744	6.14E-15	1.35E-12	23.29232412
CAMP	0.711875608	7.415246106	5.852652038	1.30E-08	4.23E-07	9.082114399
BPI	0.714129044	6.342919582	4.065176387	6.18E-05	0.000650364	0.967616622
ITGB2	0.720039106	10.57176512	15.18748819	9.31E-39	1.93E-34	77.28905293
LRRC4	0.721136309	6.790667973	9.493756239	8.51E-19	1.01E-15	32.01218137
LOC100288781	0.721444769	4.595321397	8.708794059	2.36E-16	9.22E-14	26.48907459
CRISP3	0.724034448	4.515250404	4.406599931	1.48E-05	0.000190469	2.323295903
SIGLEC5	0.728778178	9.417094178	6.915095083	2.97E-11	2.12E-09	14.9952016
CYBRD1	0.730251649	5.49269649	6.077724432	3.82E-09	1.43E-07	10.27213244
IL18RAP	0.731604631	9.613462719	6.843405628	4.58E-11	3.00E-09	14.57337573
DEFA1 /// DEFA1B /// DEFA3	0.736154816	11.8331441	3.988646476	8.41E-05	0.00084762	0.677071082
PRAM1	0.747778087	7.68588537	8.868888073	7.65E-17	3.78E-14	27.5938433
NFE4	0.74996794	7.588605353	6.587911502	2.09E-10	1.14E-08	13.09603081
CEACAM8	0.750211945	6.007737466	3.226061278	0.001398314	0.009126001	-1.942826248
SIRPA	0.750718177	8.269206637	9.343268832	2.55E-18	2.20E-15	30.93324865
ZNF467	0.751643145	6.596754175	10.32113745	1.75E-21	9.07E-18	38.09726252
OLFM4	0.753811849	6.08834424	3.373727057	0.000842231	0.005885686	-1.475254719
DAPK2	0.756464275	7.577355192	8.411218606	1.85E-15	4.99E-13	24.46709102
LOC284757	0.767173537	6.22613586	6.169828614	2.29E-09	9.12E-08	10.7691277
GPR97	0.774486498	5.901386664	7.511592974	7.23E-13	8.57E-11	18.62375118
RGL4	0.777087185	8.095313966	8.616412616	4.49E-16	1.55E-13	25.8569041
HP	0.780394686	7.378147952	5.485631487	8.96E-08	2.28E-06	7.218152571
CLEC4D	0.781875066	7.629229747	6.471324102	4.12E-10	2.07E-08	12.43565417
IGF2R	0.786305546	8.328246253	8.579424979	5.80E-16	1.88E-13	25.60490859
CYP4F2 /// CYP4F3	0.813289754	6.418935188	7.565762311	5.11E-13	6.34E-11	18.96340248
DYSF	0.814206761	10.16877509	10.90086877	2.00E-23	1.38E-19	42.49936926
ANXA3	0.814965602	8.39001989	7.477104077	9.01E-13	1.06E-10	18.40835439
REPS2	0.816671776	8.368938541	9.41618613	1.50E-18	1.56E-15	31.45489916
F5	0.828528625	8.291672096	8.226669671	6.51E-15	1.39E-12	23.23448069
ECHDC3	0.830502469	4.781752414	6.02606085	5.08E-09	1.84E-07	9.995883634
C19orf59	0.834527509	7.500778243	7.255166211	3.66E-12	3.52E-10	17.03842414
NQO2	0.834745013	8.626504353	9.374382142	2.03E-18	1.85E-15	31.15556997
FKBP5	0.852656984	6.051307959	7.206074654	4.97E-12	4.51E-10	16.73923828
IL1R1	0.854098705	6.281016825	7.223866193	4.45E-12	4.14E-10	16.8475053
LOC151438	0.867213422	6.144961089	6.75712079	7.68E-11	4.73E-09	14.06987637
MOSC1	0.876172775	7.626153325	8.025918099	2.51E-14	4.77E-12	21.91296819
CDA	0.886083795	8.362395435	9.131604922	1.18E-17	7.40E-15	29.43139533
SLC26A8	0.88935712	6.046409757	6.407536428	5.94E-10	2.85E-08	12.07806962
FOLR3	0.910847033	7.781237613	6.146863681	2.60E-09	1.03E-07	10.64467083
IL1R2	0.93703338	9.388038336	7.404786125	1.43E-12	1.59E-10	17.95887692
LTF	0.947169027	8.099461548	4.215601757	3.33E-05	0.000385993	1.553010092
CNTNAP3	0.952584355	5.904601421	5.428080261	1.20E-07	2.92E-06	6.934700066
DAAM2	1.010495457	3.856308404	4.719653286	3.68E-06	5.73E-05	3.649901424
ARG1	1.037996503	6.086580517	5.213815335	3.52E-07	7.41E-06	5.900948236
S100P	1.136399825	11.11543998	6.266566343	1.33E-09	5.79E-08	11.29728274
MMP9	1.208750652	7.825071592	8.425048446	1.68E-15	4.66E-13	24.56013096
ORM1 /// ORM2	1.436883512	5.535391024	7.883433653	6.45E-14	1.06E-11	20.98759276
ORM1	1.466783796	7.36193836	7.997871619	3.02E-14	5.45E-12	21.72998273
