# Supplementary material for: Identification of NETs-related biomarkers and molecular clusters in systemic lupus erythematosus
Source: Front Immunol. 2023 Apr 18;14:1150828. doi: 10.3389/fimmu.2023.1150828 (PMC10151561; doi:10.3389/fimmu.2023.1150828)
Supplement: Supplementary file 4 [file Table_4.xls]

id	logFC	AveExpr	t	P.Value	adj.P.Val	B
EIF2AK2	0.595465964	9.407866798	5.300958231	2.28E-07	8.29E-06	6.390215369
PLSCR1	0.600978912	7.687462897	4.388622291	1.60E-05	0.000254536	2.329591868
LAMP3	0.601709446	5.447203288	2.85018277	0.004681885	0.025798881	-2.955560288
CHMP5	0.604886014	9.631215127	7.437000876	1.16E-12	3.96E-10	18.20982047
XAF1	0.612458761	9.472103339	3.342227885	0.000939844	0.007209279	-1.490032762
LOC595101	0.617088507	6.107995127	6.772695982	7.00E-11	1.20E-08	14.21909082
SMG1	0.618538491	4.96092089	6.155515004	2.48E-09	1.94E-07	10.75659968
OAS2	0.638194153	8.575883086	3.299366691	0.001089648	0.008106308	-1.626318695
CREB5	0.642760847	9.490129736	7.493813783	8.10E-13	3.17E-10	18.56303308
TRIM6	0.65326711	4.299785877	3.669400613	0.000289133	0.002754667	-0.396471406
CEACAM8	0.658610595	6.007737466	2.560536673	0.010956241	0.049910697	-3.715237806
DDX60	0.674318539	8.873456031	3.394817481	0.000782249	0.006228263	-1.32059126
LOC645984	0.691718245	5.411452089	5.516347871	7.66E-08	3.37E-06	7.441515503
IFIT2	0.704569094	8.273765308	3.913988444	0.000113133	0.001282937	0.481648003
HERC5	0.710023907	8.842242154	3.123171997	0.001969531	0.012935413	-2.169374515
ZCCHC2	0.731186759	8.368277226	5.264324121	2.74E-07	9.66E-06	6.214821711
USP18	0.754307322	5.474560332	2.695621977	0.00743497	0.037087235	-3.370560173
EPSTI1	0.78706592	8.654463575	3.250995092	0.001285225	0.009211078	-1.778166078
IFIT3	0.79127373	9.056633603	3.541114562	0.000463862	0.004062907	-0.836420007
IFI44	0.799462863	8.982979503	2.866439295	0.004454377	0.024822203	-2.910638848
IFIT5	0.865781996	7.517750075	5.393375094	1.43E-07	5.69E-06	6.837111573
CMPK2	0.940145006	8.652126452	3.83839771	0.000151976	0.001632383	0.204796149
RSAD2	0.940454965	10.05082198	3.259762768	0.001247519	0.008996447	-1.750797231
IFIT1	0.96315471	9.307482048	3.538715604	0.000467921	0.004089819	-0.844510626
IFI44L	1.017840936	9.07905162	3.117132319	0.002008981	0.013144566	-2.187496935
