# Supplementary material for: Identification of NETs-related biomarkers and molecular clusters in systemic lupus erythematosus
Source: Front Immunol. 2023 Apr 18;14:1150828. doi: 10.3389/fimmu.2023.1150828 (PMC10151561; doi:10.3389/fimmu.2023.1150828)
Supplement: Supplementary file 5 [file Table_5.xls]

id	logFC	AveExpr	t	P.Value	adj.P.Val	B
ZFP82	0.587193559	5.408383274	6.251587665	1.44E-09	7.10E-08	11.23009521
HLA-DPB1	0.595328169	10.98716571	6.327448476	9.40E-10	5.00E-08	11.64771902
IGK@ /// IGKC	0.596978533	5.847401897	5.219693179	3.42E-07	7.27E-06	5.945843566
IGLV2-23	0.603263075	5.604684856	5.831983363	1.46E-08	5.10E-07	8.990453463
P2RX5	0.607364662	8.904064771	5.461865879	1.01E-07	2.56E-06	7.117365916
LOC641518	0.608870205	7.091542695	5.063269403	7.33E-07	1.40E-05	5.212516378
IGHG1	0.610172658	6.067606346	4.560792233	7.52E-06	9.69E-05	2.984944358
BLNK	0.613800913	6.346988103	5.0470388	7.92E-07	1.49E-05	5.137492309
IGK@ /// IGKC /// LOC652493	0.61664065	6.168042466	5.334854148	1.93E-07	4.40E-06	6.497508728
TRD@	0.627361585	10.76287662	7.703653153	2.09E-13	4.30E-11	19.84691032
IL32	0.641039137	10.11081656	7.814796295	1.01E-13	2.21E-11	20.55693327
HIP1R /// LOC100294412	0.648846733	5.696916688	7.040881527	1.38E-11	1.50E-09	15.75613822
HLA-DQB1 /// HLA-DQB2 /// LOC100294318	0.654141082	6.054240363	3.119663128	0.001992362	0.011025499	-2.24770633
IGLJ3	0.655018447	6.794933798	6.411802061	5.80E-10	3.37E-08	12.11655847
CLLU1	0.657384999	6.010094497	4.433626678	1.32E-05	0.000154621	2.452980211
IGJ	0.668297014	7.73526137	3.497314646	0.000543425	0.003662282	-1.049553397
LOC283663	0.681445139	9.23719324	4.406329699	1.48E-05	0.000171134	2.340498878
MYOM2	0.683463079	6.372661295	3.85217241	0.000144067	0.001164041	0.190335443
LOC652493	0.685302819	6.702266527	5.682944781	3.22E-08	9.94E-07	8.224395244
IGKV4-1	0.692727001	6.214452459	6.819126352	5.30E-11	4.40E-09	14.44498373
IGLV2-23 /// LOC100293440	0.694431779	6.125642921	6.070252924	3.98E-09	1.71E-07	10.24744583
MS4A1	0.710967314	7.897660517	4.257974502	2.79E-05	0.000290827	1.739834887
IGKV1D-13	0.737858251	7.476512774	5.904112479	9.87E-09	3.63E-07	9.366815212
TCL1A	0.739548011	6.918988253	3.980401529	8.70E-05	0.00076071	0.664980088
IGKC	0.765487987	8.412881031	5.061519918	7.39E-07	1.41E-05	5.204419891
IGK@ /// IGKC /// LOC652493 /// LOC652694	0.76864688	7.197011548	5.372673116	1.59E-07	3.74E-06	6.6808315
CYAT1 /// IGLV1-44	0.772040489	10.70536433	5.476548145	9.39E-08	2.40E-06	7.189785339
IGK@ /// IGKC /// IGKV3D-15	0.789078401	6.268931986	6.047113857	4.52E-09	1.91E-07	10.12365919
TNFRSF17	0.79791413	5.926144897	4.677619957	4.45E-06	6.24E-05	3.485117353
IGHM	0.817757002	7.91509939	5.680941428	3.25E-08	1.00E-06	8.214205511
IGK@ /// IGKC /// IGKV3-20 /// LOC100291682	0.848269833	7.830814729	5.67749563	3.31E-08	1.02E-06	8.196685721
IGK@ /// IGKC /// LOC100291464	0.859438469	7.39809426	5.552697373	6.35E-08	1.72E-06	7.567911084
HLA-DQB1	0.863643437	5.908099445	2.834641959	0.004909212	0.023597209	-3.067158062
LOC100293440	0.867244321	6.678206688	5.971015418	6.86E-09	2.64E-07	9.719145959
IGL@	0.909007566	10.88839657	5.655860753	3.71E-08	1.11E-06	8.086879659
IGH@ /// IGHA1 /// IGHA2 /// LOC100126583	0.92168678	8.453384507	4.149416	4.38E-05	0.000430119	1.311801404
PSPH	0.925547759	5.833218579	3.678474243	0.000279484	0.002065984	-0.430194148
IGH@ /// IGHG1 /// IGHM /// IGHV4-31 /// LOC100290146	1.068096168	8.271391134	4.957882526	1.21E-06	2.12E-05	4.728985489
